# Supplementary material
Source: MDPI journal article supplement (https://www.mdpi.com/2227-9040/10/1/8)
Supplement: s1 [file s1]

## Supplementary Material

### Contents

|                                                                                                                                                                                                                                                                                      |    |
|--------------------------------------------------------------------------------------------------------------------------------------------------------------------------------------------------------------------------------------------------------------------------------------|----|
| <b>Table S1.</b> Comparison of the sensing properties of different Spm/Spd selective optical probes...                                                                                                                                                                               | 2  |
| <b>Figure S1.</b> $^1\text{H}$ NMR compound 1 in $\text{DMSO-d}_6$ .....                                                                                                                                                                                                             | 3  |
| <b>Figure S2.</b> $^{13}\text{C}$ NMR compound 1 in $\text{DMSO-d}_6$ .....                                                                                                                                                                                                          | 3  |
| <b>Figure S3.</b> Mass Spectroscopy data of compound 1. ....                                                                                                                                                                                                                         | 4  |
| <b>Figure S4.</b> $^1\text{H}$ NMR compound 2 in $\text{CDCl}_3\text{-d}$ .....                                                                                                                                                                                                      | 5  |
| <b>Figure S5.</b> $^1\text{H}$ NMR compound 3 in $\text{DMSO-d}_6$ .....                                                                                                                                                                                                             | 5  |
| <b>Figure S6.</b> $^{13}\text{C}$ NMR compound 3 in $\text{DMSO-d}_6$ .....                                                                                                                                                                                                          | 6  |
| <b>Figure S7.</b> $^1\text{H}$ NMR compound 4 in $\text{DMSO-d}_6$ .....                                                                                                                                                                                                             | 6  |
| <b>Figure S8.</b> $^{13}\text{C}$ NMR compound 4 in $\text{DMSO-d}_6$ .....                                                                                                                                                                                                          | 7  |
| <b>Figure S9.</b> $^1\text{H}$ NMR compound 5 in $\text{DMSO-d}_6$ .....                                                                                                                                                                                                             | 7  |
| <b>Figure S10.</b> $^1\text{H}$ NMR compound 6 in $\text{DMSO-d}_6$ .....                                                                                                                                                                                                            | 8  |
| <b>Figure S11.</b> $^{13}\text{C}$ NMR compound 6 in $\text{DMSO-d}_6$ .....                                                                                                                                                                                                         | 8  |
| <b>Figure S12.</b> 50 $\mu\text{M}$ of the sensor in acetonitrile in the presence of 2 equiv of different amines (in phosphate buffer =7.4) (final solvent acetonitrile:water 98:2) ( $\lambda_{\text{em}}$ at 473 nm, $\lambda_{\text{exc}}$ = 340 nm). ....                        | 9  |
| <b>Figure S13.</b> (left) Fluorescence titration of sensor (50 $\mu\text{M}$ in acetonitrile) with Spd (in urine). ....                                                                                                                                                              | 9  |
| <b>Determination of recovery and accuracy of the method</b> .....                                                                                                                                                                                                                    | 10 |
| <b>Table S2.</b> Recovery and accuracy of the method were calculated according to reference K. A. Rawat, R. K. Singhal, S. K. Kailasa, RSC Adv. 6 (2016) 32025-32036.....                                                                                                            | 10 |
| <b>Complete citation for reference [44] in the main text</b> .....                                                                                                                                                                                                                   | 10 |
| <b>Computational methods for theoretical calculations</b> .....                                                                                                                                                                                                                      | 10 |
| a) Computational methods for molecular dynamics simulation.....                                                                                                                                                                                                                      | 10 |
| b) Computational methods for DFT calculations. ....                                                                                                                                                                                                                                  | 11 |
| <b>Energy results for DFT calculations</b> .....                                                                                                                                                                                                                                     | 12 |
| <b>Table S3.</b> Computed energies (E, H and G in atomic units, a.u.) for the chemosensor and the biogenic amines/neurotransmitters studied at the same protonation state predicted by Chemicalize and simulated through molecular dynamics. ....                                    | 12 |
| <b>Table S4.</b> Stabilization ( $\Delta\text{E}$ , $\Delta\text{H}$ and $\Delta\text{G}$ in kcal/mol) of the chemosensor:biogenic amines/neurotransmitters complexes computed at the same protonation state predicted by Chemicalize and simulated through molecular dynamics. .... | 13 |
| <b>Cartesian coordinates of optimized DFT structures</b> .....                                                                                                                                                                                                                       | 13 |

**Table S1.** Comparison of the sensing properties of different Spm/Spd selective optical probes.

| Probe                                                                   | Detection technique     | Selectivity     | Limit of detection                       | Application                        | Reference                      |
|-------------------------------------------------------------------------|-------------------------|-----------------|------------------------------------------|------------------------------------|--------------------------------|
| Tetraphenylethylene derivative                                          | Fluorescence "turn on"  | For Spm and Spd | 0.70 $\mu$ M (Spm)<br>1.17 $\mu$ M (Spd) | Aqueous media and urine            | This study                     |
| Sulfonated derivative                                                   | Fluorescence "turn on"  | For Spm and Spd | 0.6 $\mu$ M (Spm)                        | Aqueous media and artificial urine | Kim <i>et al.</i> , 2016       |
| Polymer-Surfactant complexation                                         | Fluorescence "turn off" | For Spm         | 66 ppb                                   | Aqueous media and urine            | Malik <i>et al.</i> , 2016     |
| Tetraphenylethylene conjugated pentiptycene                             | Fluorescence "turn on"  | For Spm         | 0.3 $\mu$ M                              | Artificial urine                   | Huang <i>et al.</i> , 2021     |
| Chemosensor based on pyrocatechol violet and anionic phenylboronic acid | Abs                     | For Spm         | 6.24 $\mu$ M                             | Aqueous media                      | Fukushima <i>et al.</i> , 2021 |
| Ionic self-assembly of benzimidazolium based dipod and dodecylsulfate   | Fluorescence "turn off" | For Spm         | ENS1 - 6 nM<br>ENS2- 500 nM              | Urine and blood serum              | Tripathi <i>et al.</i> , 2018  |
| Terphenyl derivative                                                    | Fluorescence "turn on"  | For Spd         | 46 nM                                    | Aqueous media and artificial urine | Tejpal <i>et al.</i> , 2018    |

Kim, T. I.; & Kim, Y. Analyte-directed formation of emissive excimers for the selective detection of polyamines. *ChemComm* **2016**, 52, 10648-10651.

Malik, A. H.; Hussain, S.; Iyer, P. K. Aggregation-induced FRET via polymer-surfactant complexation: A new strategy for the detection of spermine. *Anal. Chem.* **2016**, 88, 7358-7364.

Huang, J.; Ye, W.; Zha, S.; Tao, Y.; Yang, M.; Huang, K.; Lee, C. S. Sensitive and responsive pentiptycene-based molecular fluorescence chemosensor for detection of polyamines. *J. Lumin.* **2021**, 232, 117856.

Fukushima, Y.; Aikawa, S. Colorimetric chemosensor for spermine based on pyrocatechol violet and anionic phenylboronic acid in aqueous solution. *Microchem. J.* **2021**, 162, 105867.

Tripathi, N.; Singh, P.; Luxami, V.; Mahajan, D.; Kumar, S. Spermine detection from urine and blood serum using ionic self-assembly of benzimidazolium based dipod and dodecylsulfate. *Sens.* **2018**, 270, 552-561.

Tejpal, R., Kumar, M., & Bhalla, V. Spermidine induced aggregation of terphenyl derivative: An efficient probe for detection of spermidine in living cells. *Sens. Actuators B: Chem.* **2018**, 258, 841-849.

**Compound 1**  $^1\text{H}$  NMR (300 MHz,  $\text{DMSO}-d_6$ )  $\delta$  13.36 (s, 2H), 8.17 (s, 2H), 7.19 – 7.04 (m, 6H), 7.00 – 6.94 (m, 4H), 6.89 (d,  $J = 8.8$  Hz, 4H), 6.81 (d,  $J = 8.9$  Hz, 4H), 5.28 (s, 4H), 5.06 (s, 4H).

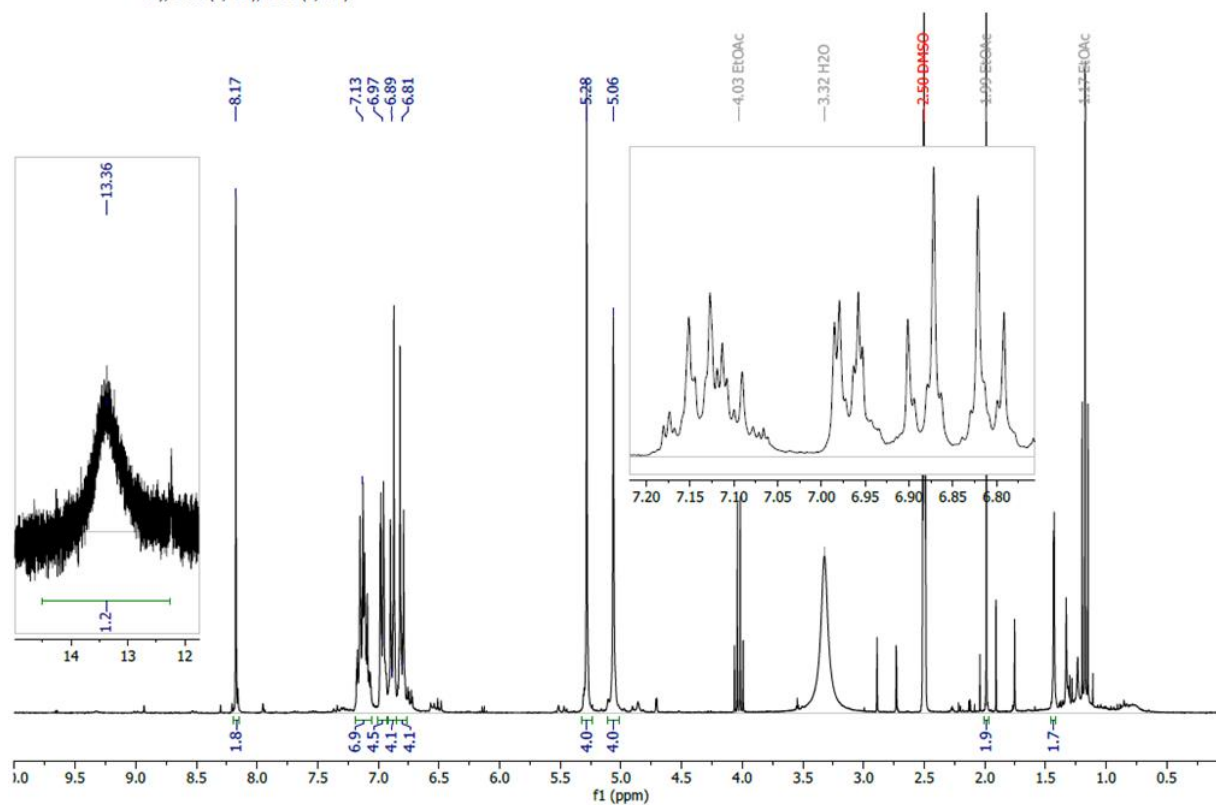

**Figure S1.**  $^1\text{H}$  NMR compound 1 in  $\text{DMSO}-d_6$ .

**Compound 1**  $^{13}\text{C}$  NMR (75 MHz,  $\text{DMSO}$ )  $\delta$  168.60, 156.63, 143.75, 142.48, 139.70, 138.99, 135.95, 132.03, 130.72, 127.88, 125.99, 113.87, 60.86, 59.77, 50.55, 27.63, 20.78, 14.10.

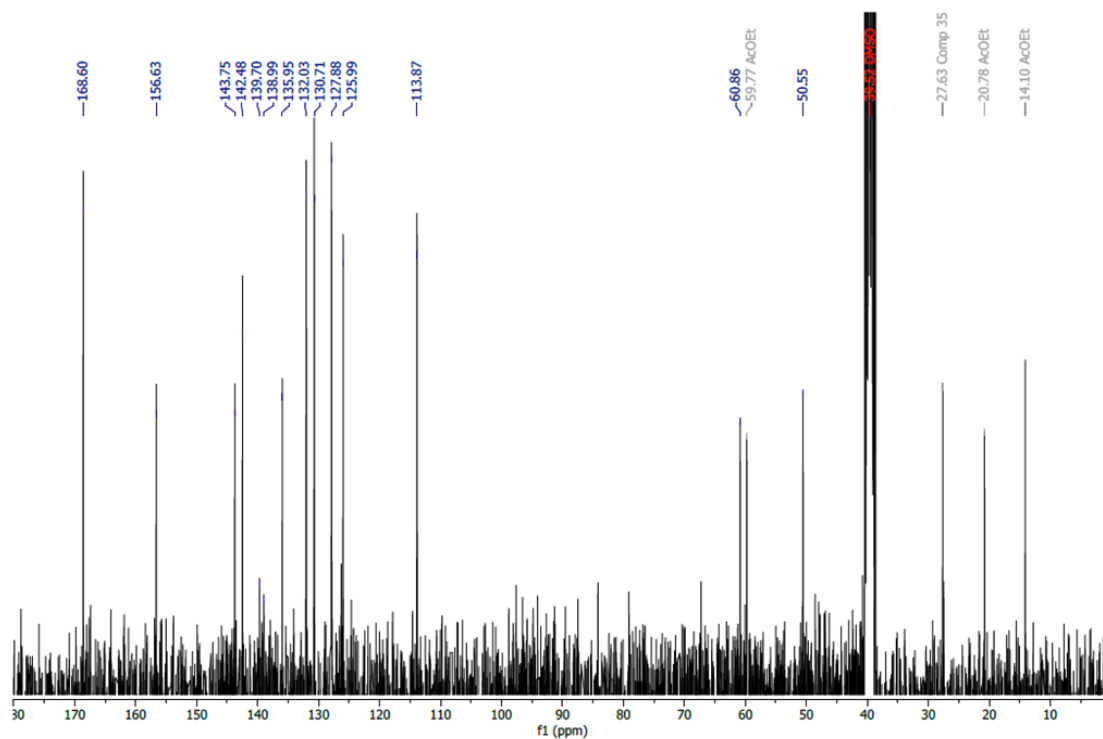

**Figure S2.**  $^{13}\text{C}$  NMR compound 1 in  $\text{DMSO}-d_6$ .

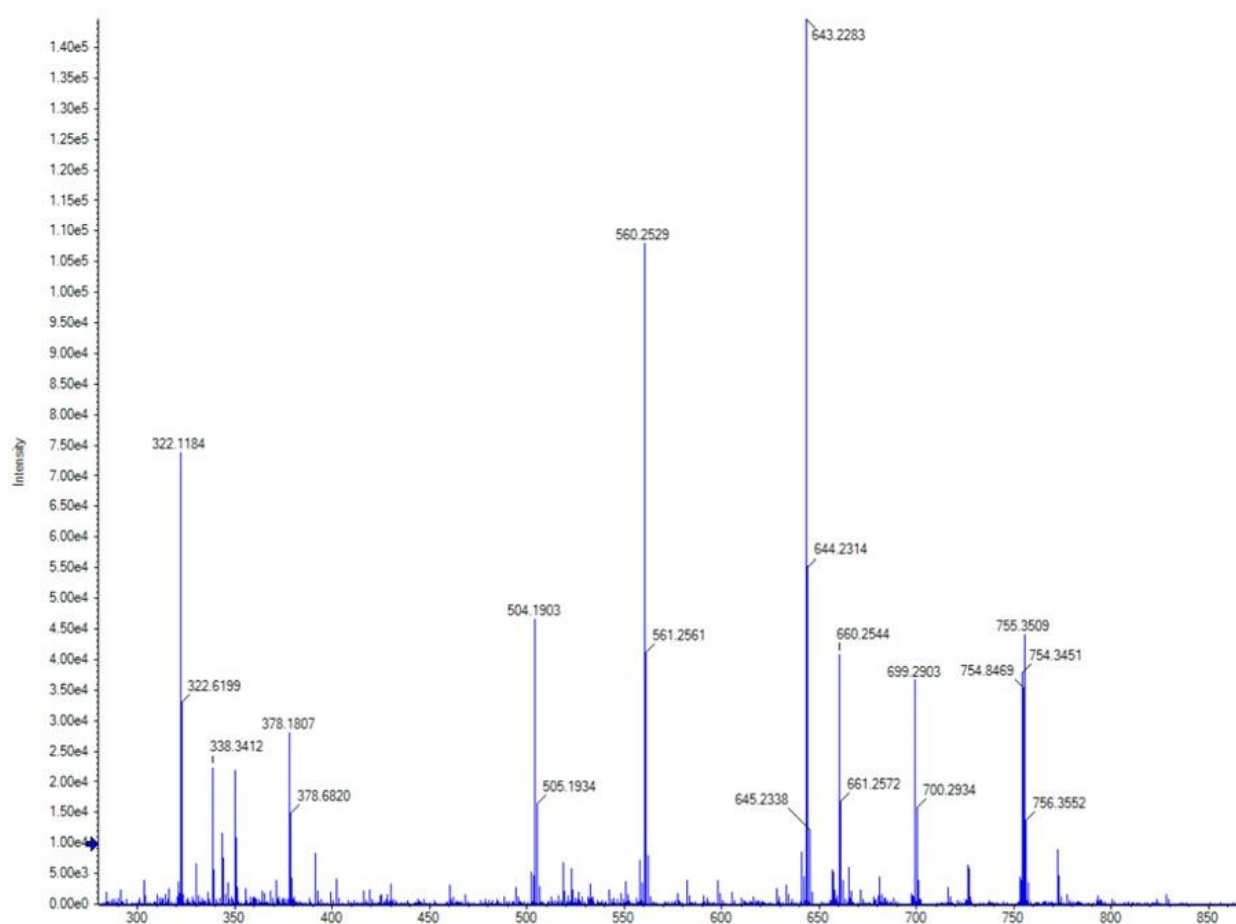

Figure S3. Mass Spectrometry data of compound 1.

**Compound 2**  $^1\text{H}$  NMR (300 MHz, Chloroform- $d$ )  $\delta$  7.15 – 7.06 (m, 6H), 7.06 – 7.00 (m, 4H), 6.95 (d,  $J$  = 8.9 Hz, 4H), 6.64 (d,  $J$  = 8.8 Hz, 4H), 3.74 (s, 6H).

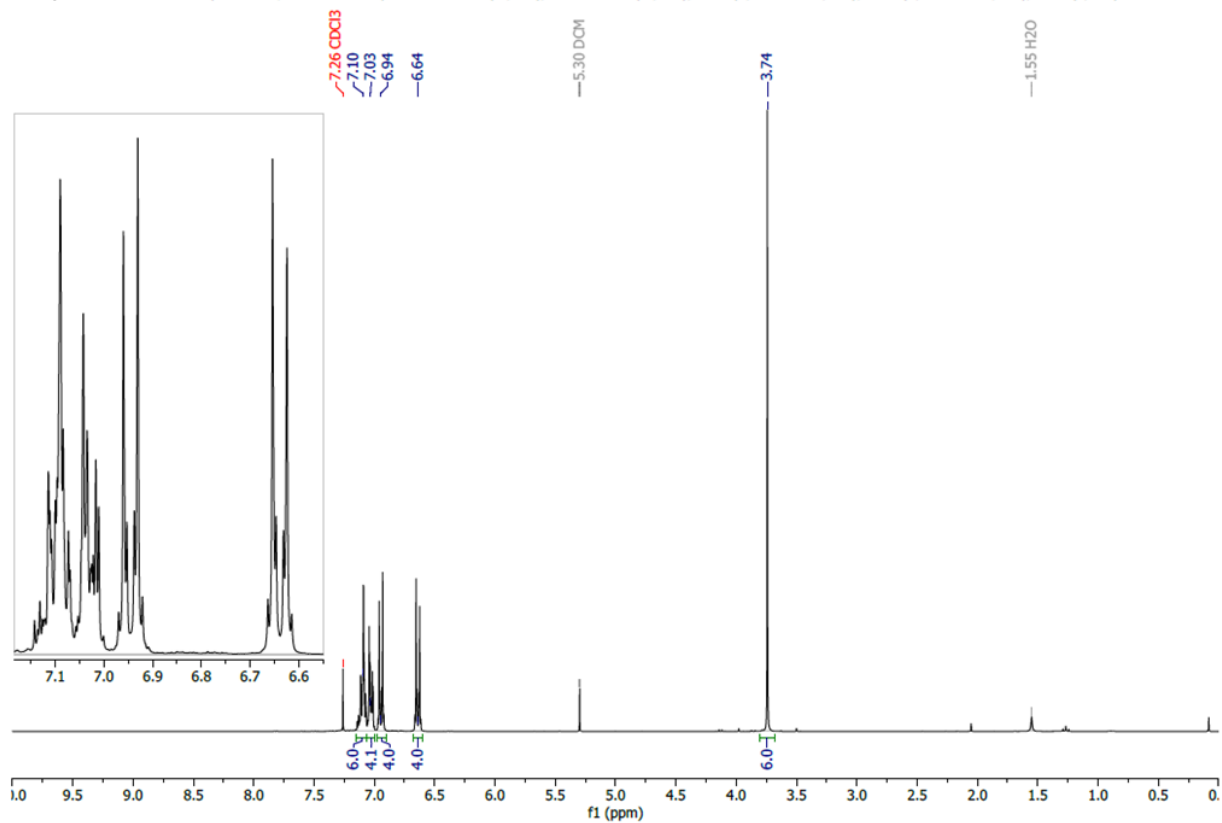

**Figure S4.**  $^1\text{H}$  NMR compound 2 in  $\text{CDCl}_3$ - $d$ .

**Compound 3**  $^1\text{H}$  NMR (300 MHz,  $\text{DMSO}-d_6$ )  $\delta$  9.30 (s, 2H), 7.17 – 7.02 (m, 6H), 6.95 – 6.91 (m, 4H), 6.74 (d,  $J$  = 8.6 Hz, 4H), 6.48 (d,  $J$  = 8.6 Hz, 4H).

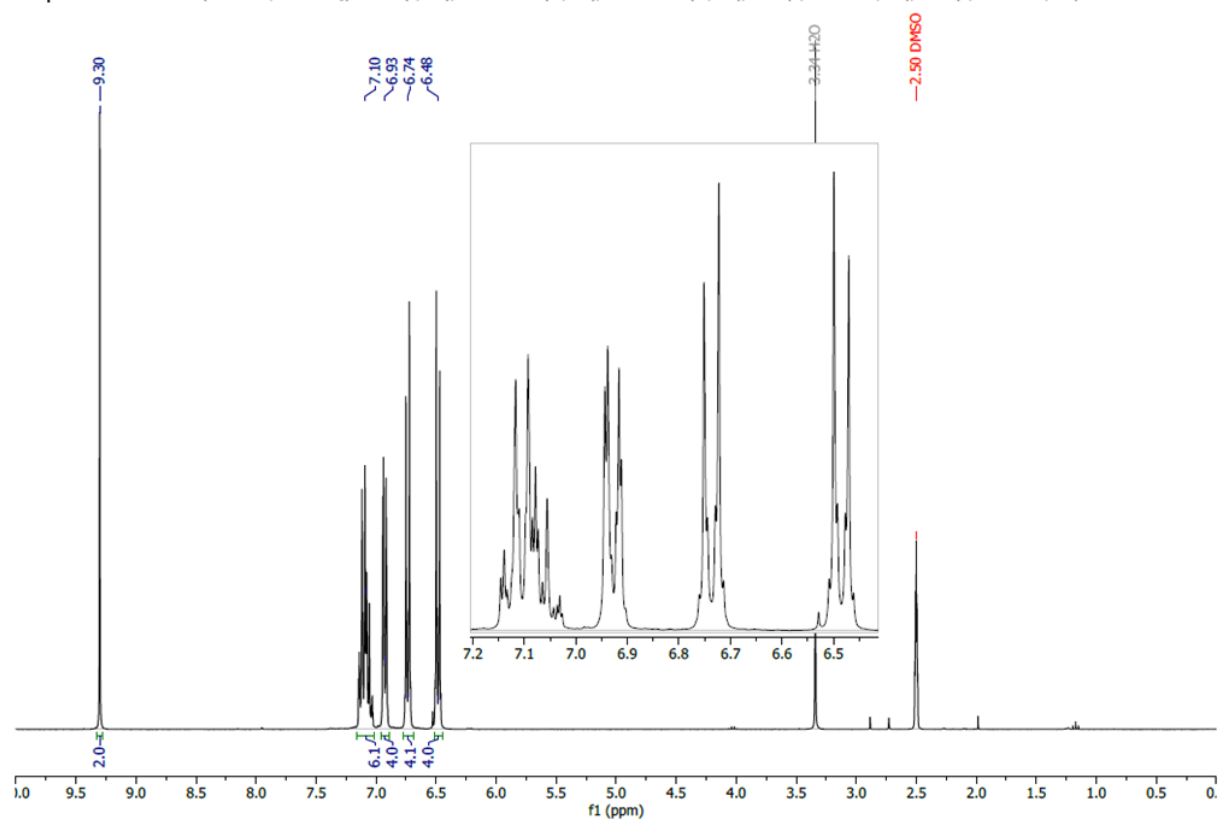

**Figure S5.**  $^1\text{H}$  NMR compound 3 in  $\text{DMSO}-d_6$ .

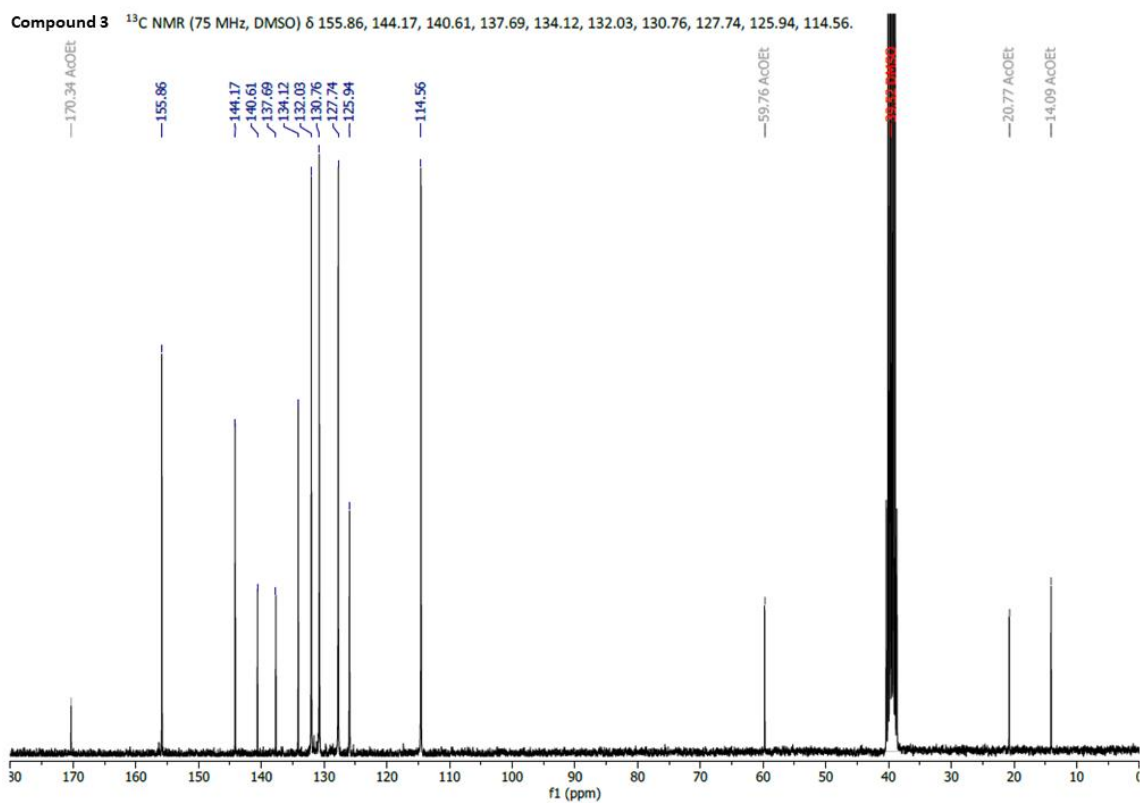

**Figure S6.**  $^{13}\text{C}$  NMR compound 3 in DMSO- $d_6$ .

**Compound 4**  $^1\text{H}$  NMR (300 MHz, DMSO- $d_6$ )  $\delta$  7.19 – 7.07 (m, 6H), 7.00 – 6.92 (m, 4H), 6.88 (d,  $J$  = 8.7 Hz, 4H), 6.73 (d,  $J$  = 8.8 Hz, 4H), 4.71 (d,  $J$  = 2.4 Hz, 4H), 3.54 (t,  $J$  = 2.3 Hz, 2H).

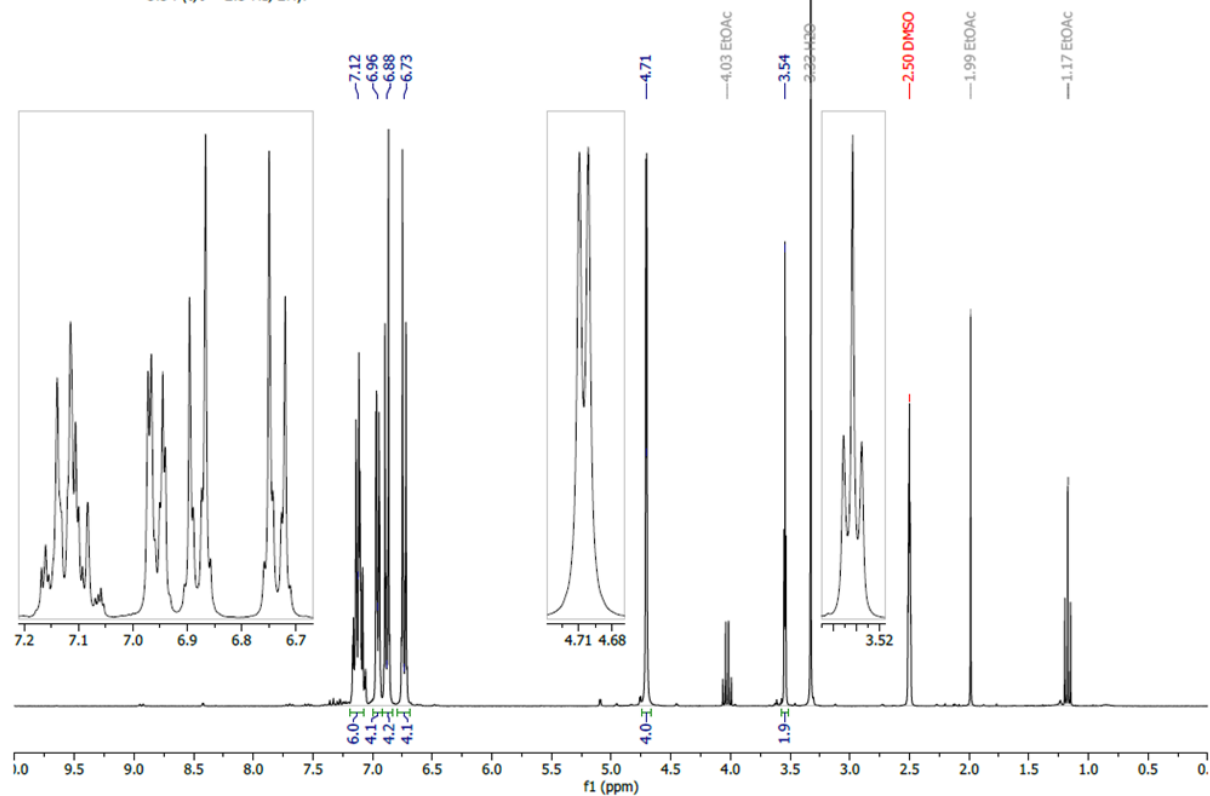

**Figure S7.**  $^1\text{H}$  NMR compound 4 in DMSO- $d_6$ .

**Compound 4**  $^{13}\text{C}$  NMR (75 MHz, DMSO)  $\delta$  155.74, 143.63, 139.53, 139.23, 136.27, 131.90, 130.67, 127.85, 126.30, 114.01, 79.21, 78.19, 55.28.

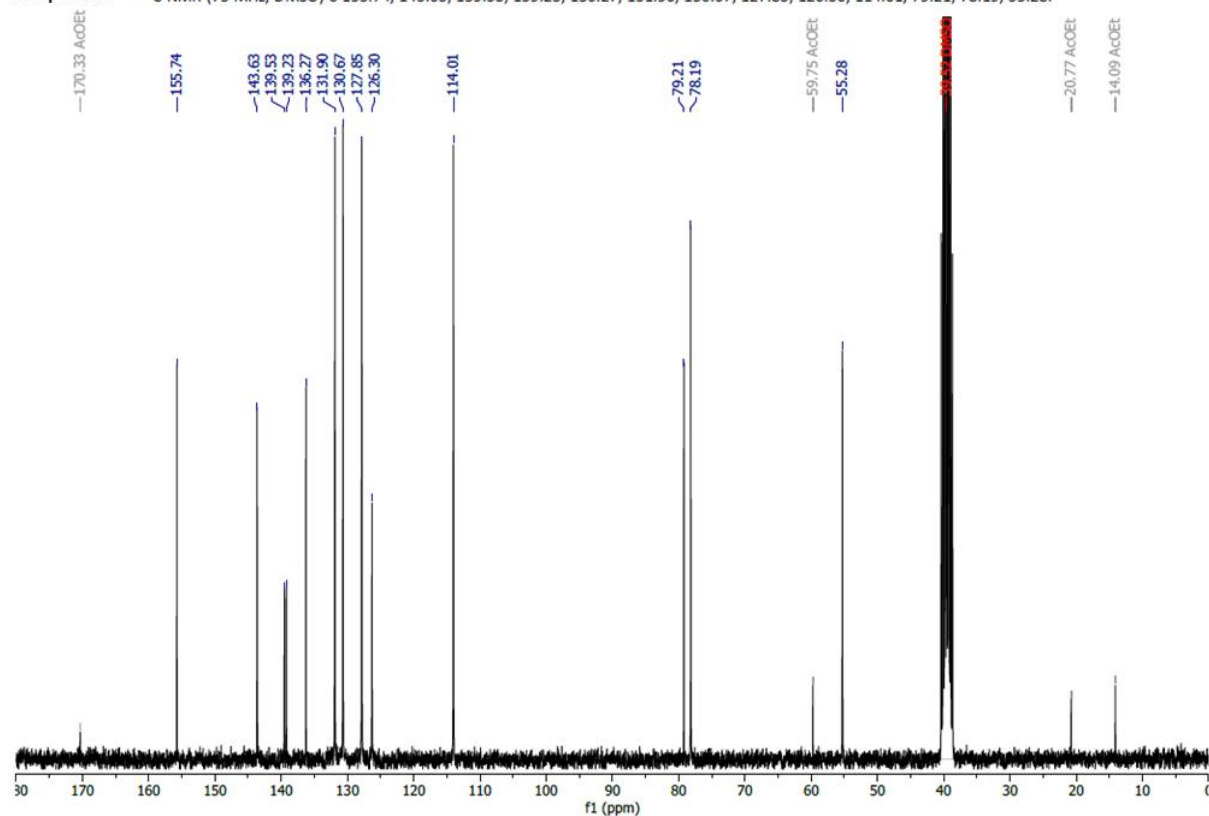

**Figure S8.**  $^{13}\text{C}$  NMR compound 4 in DMSO- $d_6$ .

**Compound 5**  $^1\text{H}$  NMR (300 MHz, DMSO- $d_6$ )  $\delta$  3.95 (s, 2H), 1.45 (s, 9H).

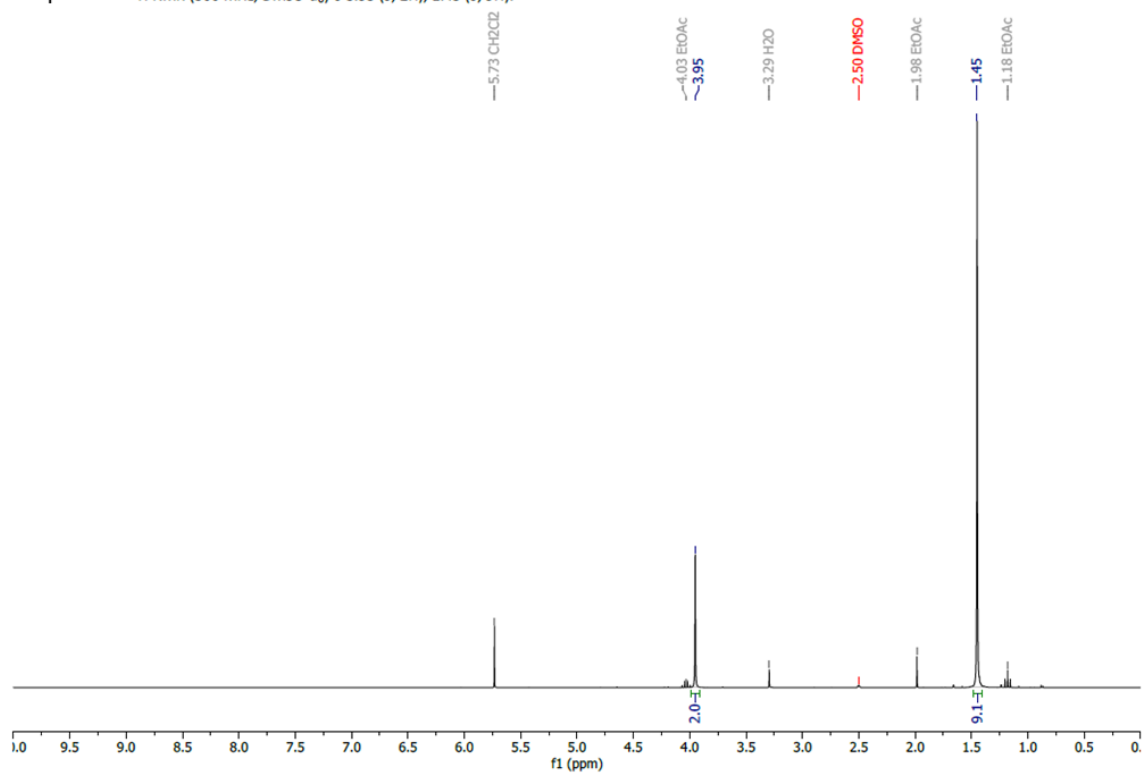

**Figure S9.**  $^1\text{H}$  NMR compound 5 in DMSO- $d_6$ .

**Compound 6**  $^1\text{H}$  NMR (300 MHz,  $\text{DMSO}-d_6$ )  $\delta$  8.17 (s, 2H), 7.17 – 7.05 (m, 6H), 6.99 – 6.94 (m, 4H), 6.88 (d,  $J = 8.8$  Hz, 4H), 6.80 (d,  $J = 8.9$  Hz, 4H), 5.28 (s, 4H), 5.06 (s, 4H), 1.43 (s, 18H).

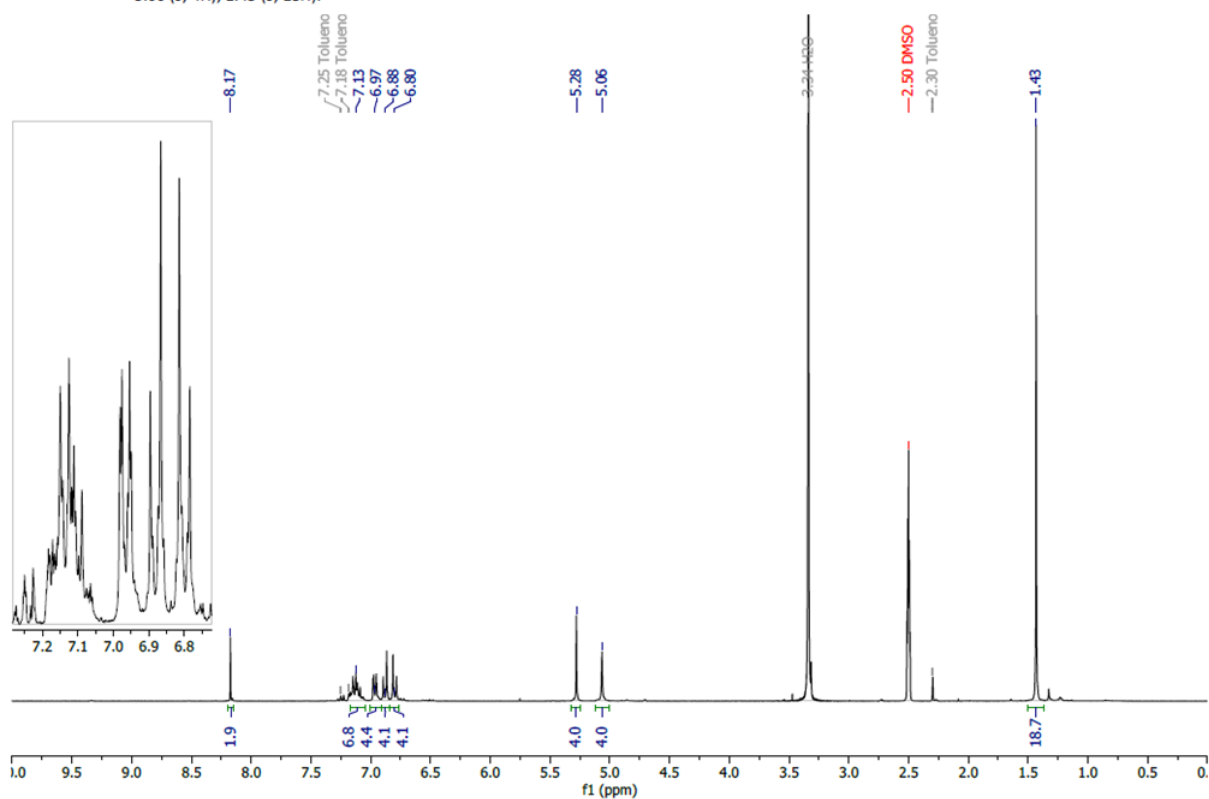

**Figure S10.**  $^1\text{H}$  NMR compound 6 in  $\text{DMSO}-d_6$ .

**Compound 6**  $^{13}\text{C}$  NMR (75 MHz,  $\text{DMSO}$ )  $\delta$  166.22, 156.60, 143.74, 142.55, 139.68, 138.98, 135.94, 132.01, 130.70, 127.86, 126.26, 126.00, 113.85, 82.38, 60.82, 50.94, 27.63.

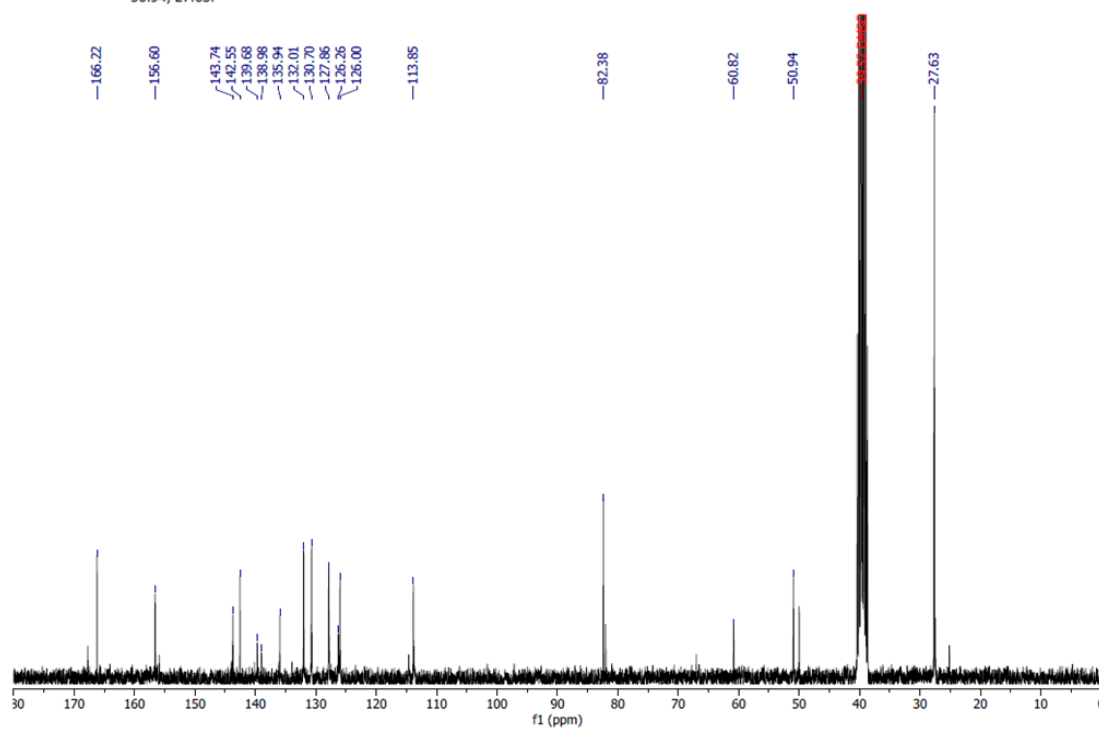

**Figure S11.**  $^{13}\text{C}$  NMR compound 6 in  $\text{DMSO}-d_6$ .



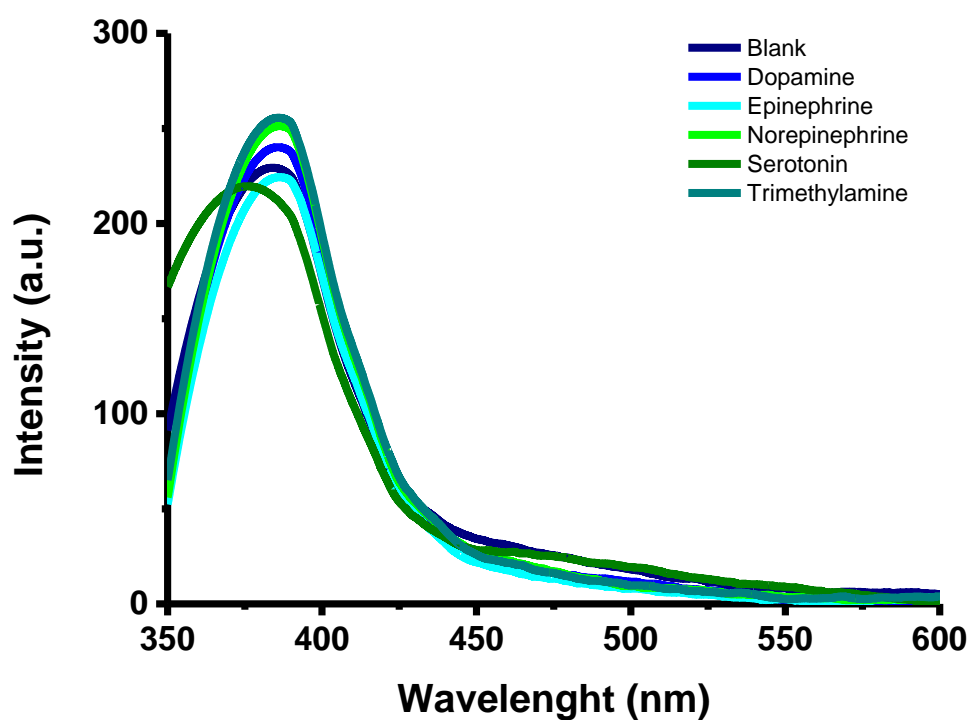

**Figure S12.** 50  $\mu\text{M}$  of the sensor in acetonitrile in the presence of 2 equiv of different amines (in phosphate buffer  $\text{pH} = 7.4$ ) (final solvent acetonitrile:water 98:2) ( $\lambda_{\text{em}}$  at 473 nm,  $\lambda_{\text{exc}}$  = 340 nm).

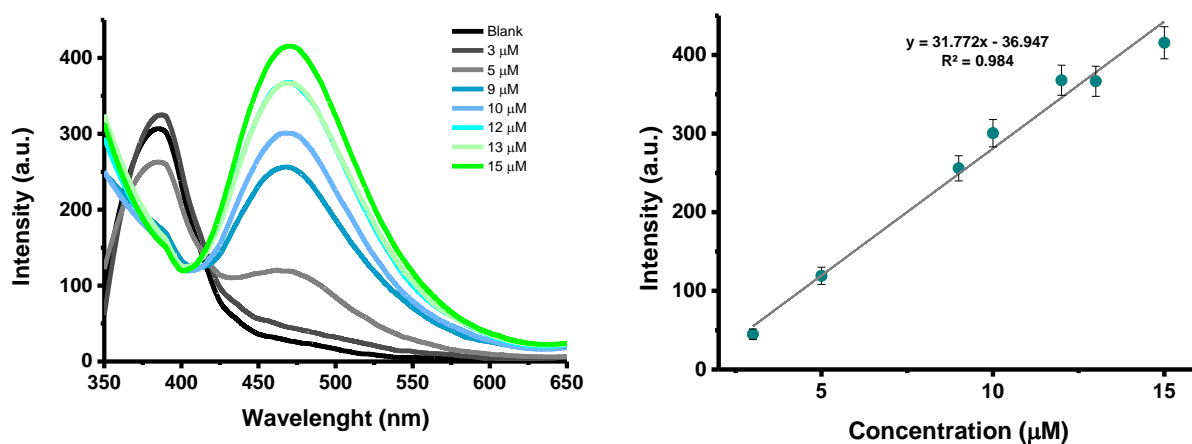

**Figure S13.** (left) Fluorescence titration of sensor (50  $\mu\text{M}$  in acetonitrile) with Spd (in urine). (final solvent acetonitrile:water 98:2) (right) Calibration curve: emission at  $\lambda_{\text{em}}$  = 470 nm.

## Determination of recovery and accuracy of the method

**Table S2.** Recovery and accuracy of the method were calculated according to reference K. A. Rawat, R. K. Singhal, S. K. Kailasa, RSC Adv. 6 (2016) 32025-32036.

| Analite | Known concentration ( $\mu\text{M}$ ) | Found concentration ( $\mu\text{M}$ ) | Recovery % <sup>a</sup> | Accuracy % <sup>b</sup> |
|---------|---------------------------------------|---------------------------------------|-------------------------|-------------------------|
| Spm     | 10                                    | 9                                     | 90                      | -10                     |
| Spd     | 18                                    | 24                                    | 133                     | 33                      |

<sup>a</sup> recovery % (found concentration/known concentration)  $\times$  100

<sup>b</sup> accuracy % (found concentration – known concentration/known concentration)  $\times$  100

### Complete citation for reference [44] in the main text.

Gaussian 16, Revision A.03, M. J. Frisch, G. W. Trucks, H. B. Schlegel, G. E. Scuseria, M. A. Robb, J. R. Cheeseman, G. Scalmani, V. Barone, G. A. Petersson, H. Nakatsuji, X. Li, M. Caricato, A. V. Marenich, J. Bloino, B. G. Janesko, R. Gomperts, B. Mennucci, H. P. Hratchian, J. V. Ortiz, A. F. Izmaylov, J. L. Sonnenberg, D. Williams-Young, F. Ding, F. Lipparini, F. Egidi, J. Goings, B. Peng, A. Petrone, T. Henderson, D. Ranasinghe, V. G. Zakrzewski, J. Gao, N. Rega, G. Zheng, W. Liang, M. Hada, M. Ehara, K. Toyota, R. Fukuda, J. Hasegawa, M. Ishida, T. Nakajima, Y. Honda, O. Kitao, H. Nakai, T. Vreven, K. Throssell, J. A. Montgomery, Jr., J. E. Peralta, F. Ogliaro, M. J. Bearpark, J. J. Heyd, E. N. Brothers, K. N. Kudin, V. N. Staroverov, T. A. Keith, R. Kobayashi, J. Normand, K. Raghavachari, A. P. Rendell, J. C. Burant, S. S. Iyengar, J. Tomasi, M. Cossi, J. M. Millam, M. Klene, C. Adamo, R. Cammi, J. W. Ochterski, R. L. Martin, K. Morokuma, O. Farkas, J. B. Foresman, and D. J. Fox, Gaussian, Inc., Wallingford CT, 2016.

### Computational methods for theoretical calculations.

#### a) Computational methods for molecular dynamics simulation.

The protonation state of the amines was obtained with the Chemicalize tool<sup>41</sup> of ChemAxon. The main species obtained for each amine at the pH of 7.4 used at the experimental tests is shown in the legend of Figure 4. All the molecules under study were parameterized following the protocol established by AMBER. First, geometric optimization at the HF/6-31G (d) [1] *ab initio* method to obtain the equilibrium atom coordinates and the RESP charges on the atoms of each molecule was performed. Subsequently, the antechamber module was used together with the *general AMBER force field* (GAFF) [2] for organic molecules included in the AmberTools18 [3] to generate the parameters file for each molecule. For building the system, an amine molecule was placed at approximately 6 Å from the sensor. All molecular dynamics simulations were performed using the Amber18 program [3]. The implicit Generalized Born solvation model [4] implemented in sander was used to simulate the role of the solvent stabilizing ionic charges. Long range interactions were not considered by setting a cutoff of 999. The simulation protocol included a short geometric optimization process of the system (500 steps) to relax the possible deviations from the equilibrium positions when constructing the system, followed by a molecular dynamics simulation of 50 ns with a time step of 0.001 ps at constant temperature of 300 K, resulting on a molecular dynamics trajectory formed by 50,000 snapshots of every amine together with the

chemosensor. The *hbond* utility considers a hydrogen bond, A...H-D, if the distance between an acceptor heavy atom of the sensor, A, and a polar heavy atom of the amine, D, bound to a polar hydrogen, H, is less of 3.0 Å, and the angle formed by A-H-D is less of 135.0 degrees.

To obtain the binding energy of each sensor:amine complex, the *cluster* command of the *ptraj* program of Amber12 [5] was used to process the 50,000 snapshots of the molecular dynamic trajectories to end up with 250 representative structures which were submitted for a binding energy calculation.

1. Cornell, W. D.; P. Cieplak, C. I. Bayly, I. R. Gould, K. M. Merz Jr., D. M. Ferguson, D. C. Spellmeyer, T. Fox, J. W. Caldwell, P. A. Kollman. A second generation force field for the simulation of proteins, nucleic acids, and organic molecules. *J. Am. Chem. Soc.*, **1995**, *117*, 5179–5197. <https://doi.org/10.1021/ja00124a002>
2. Wang, J.; Wolf, R. M.; Caldwell, J. W.; Kollman, P. A.; Case, D. A. Development and Testing of a General Amber Force Field, *J. Comp. Chem.*, **2004**, *25*, 1157–1174. <https://doi.org/10.1002/jcc.20035>
3. Case, D. A.; Ben-Shalom, I. Y.; Brozell, S. R.; Cerutti, D. S.; Cheatham III, T. E.; Cruzeiro, V. W. D.; Darden, T. A.; Duke, R. E.; Ghoreishi, D.; Gilson, M. K.; Gohlke, H.; Goetz, A. W.; Greene, D.; Harris, R.; Homeyer, N.; Huang, Y.; Izadi, S.; Kovalenko, A.; Kurtzman, T.; Lee, T. S.; LeGrand, S.; Li, P.; Lin, C.; Liu, J.; Luchko, T.; Luo, R.; Mermelstein, D. J.; Merz, K. M.; Miao, Y.; Monard, G.; Nguyen, C.; Nguyen, H.; Omelyan, I.; Onufriev, A.; Pan, F.; Qi, R.; Roe, D. R.; Roitberg, A.; Sagui, C.; Schott-Verdugo, S.; Shen, J.; Simmerling, C. L.; Smith, J.; SalomonFerrer, R.; Swails, J.; Walker, R. C.; Wang, J.; Wei, H.; Wolf, R. M.; Wu, X.; Xiao, L.; York, D. M.; Kollman, P. A. AMBER 18, **2018**, University of California, San Francisco.
4. Tsui, V.; Case, D. A. Theory and applications of the generalized Born solvation model in macromolecular simulations, *Biopolymers*, **2000–2001**, *56*, 275–291. [https://doi.org/10.1002/1097-0282\(2000\)56:4%3C275::aid-bip10024%3E3.0.co;2-e](https://doi.org/10.1002/1097-0282(2000)56:4%3C275::aid-bip10024%3E3.0.co;2-e)
5. Case, D. A.; Darden, T. A.; Cheatham III, T. E.; Simmerling, C. L.; Wang, J.; Duke, R. E.; Luo, R.; Walker, R. C.; Zhang, W.; Merz, K. M.; Roberts, B.; Hayik, S.; Roitberg, A.; Seabra, G.; Swails, J.; Götz, A. W.; Kolossváry, I.; Wong, K. F.; Paesani, F.; Vanicek, J.; Wolf, R. M.; Liu, J.; Wu, X.; Brozell, S. R.; Steinbrecher, T.; Gohlke, H.; Cai, Q.; Ye, X.; Wang, J.; Hsieh, M.-J.; Cui, G.; Roe, D. R.; Mathews, D. H.; Seetin, M. G.; Salomon-Ferrer, R.; Sagui, C.; Babin, V.; Luchko, T.; Gusarov, S.; Kovalenko, A.; Kollman, P. A. AMBER 12, **2012**, University of California, San Francisco.

#### b) Computational methods for DFT calculations.

Selected structures of the complexes between the chemosensor **1** and the biogenic amines/neurotransmitters that remained hydrogen-bonded along the molecular dynamics simulation (that is, Det, Cad, Put, Spm, Spd and Dop) were further optimized at M062X/6-31+G(2d-p)/PCM(acetonitrile) level was carried out taking into account the empirical dispersion through the D3 version of Grimme's dispersion parametrisation as well as the original D3 damping function using Gaussian16 Rev. A.03 package. Also, the isolated chemosensor **1** (in its dicarboxylate form) and the isolated amines/neurotransmitters (in the same protonation state they were simulated through molecular dynamics) were submitted for its optimization at the same theory level.

Furthermore, over the optimized geometries, a frequency calculation was performed to ensure that no imaginary frequencies were present, and the common thermochemical calculations were

performed using a scale factor of 0.952 at the same theory level in order to compute the stabilization of the complex respect to the isolated components.

#### Energy results for DFT calculations.

The electronic energy, enthalpy, and free energy of the studied species (isolated and forming hydrogen-bonded complexes) are collected in the following table (see Table S3):

**Table S3.** Computed energies (E, H and G in atomic units, a.u.) for the chemosensor and the biogenic amines/neurotransmitters studied at the same protonation state predicted by Chemicalize and simulated through molecular dynamics.

| Species               | E (in a.u.)    | H (in a.u.)  | G <sup>a</sup> (in a.u.) |
|-----------------------|----------------|--------------|--------------------------|
| TPE 1 (dicarboxylate) | -2168.14322459 | -2167.541581 | -2167.665915             |
| Cad2+                 | -309.24211844  | -309.013680  | -309.060097              |
| Dop1+                 | -516.96428098  | -516.761644  | -516.810915              |
| Det2+                 | -325.26680434  | -325.048447  | -325.093812              |
| Put2+                 | -269.94342236  | -269.743317  | -269.785164              |
| Spd3+                 | -443.60511201  | -443.285450  | -443.340342              |
| Spm3+                 | -616.82409867  | -616.401341  | -616.470399              |
| Spm4+                 | -617.26603604  | -616.826892  | -616.895389              |
| 1:Cad2+ complex       | -2477.45579131 | -2476.626897 | -2476.773346             |
| 1:Dop1+ complex       | -2685.16257526 | -2684.359040 | -2684.506257             |
| 1:Det2+ complex       | -2493.48397007 | -2492.665029 | -2492.809916             |
| 1:Put2+ complex       | -2438.16037466 | -2437.359067 | -2437.500291             |
| 1:Spd3+ complex       | -2611.85008179 | -2610.930254 | -2611.081082             |
| 1:Spm3+ complex       | -2785.08616218 | -2784.062565 | -2784.222149             |
| 1:Spm4+ complex       | -2785.53992547 | -2784.500597 | -2784.659287             |

<sup>a</sup>Calculated at 298.15 K, 1 atm and with a scale factor of 0.952.

The energy stabilization of the complexes present in Table S3 was calculated in terms of  $\Delta G$  ( $\Delta G_{\text{stabilization}} = G_{\text{complex}} - G_{\text{chemosensor}} - G_{\text{amine/neurotransmitter}}$ ) at 298.15 K and 1 atm and are depicted in the following Table S4:

**Table S4.** Stabilization ( $\Delta E$ ,  $\Delta H$  and  $\Delta G$  in kcal/mol) of the chemosensor: biogenic amines/neurotransmitters complexes computed at the same protonation state predicted by Chemicalize and simulated through molecular dynamics.

| Energy stabilized species | $\Delta E$<br>(in kcal/mol) | $\Delta G^a$<br>(in kcal/mol) | $\Delta G^a$<br>per positively charged amine<br>nitrogen (in kcal/mol) |
|---------------------------|-----------------------------|-------------------------------|------------------------------------------------------------------------|
| 1:Cad2+ complex           | -44.2                       | -29.7                         | -14.9                                                                  |
| 1:Dop1+ complex           | -34.6                       | -18.5                         | -18.5                                                                  |
| 1:Det2+ complex           | -46.4                       | -31.5                         | -15.7                                                                  |
| 1:Put2+ complex           | -46.3                       | -30.9                         | -15.4                                                                  |
| 1:Spd3+ complex           | -63.8                       | -47.0                         | -15.7                                                                  |
| 1:Spm3+ complex           | -74.6                       | -53.9                         | -18.0                                                                  |
| 1:Spm4+ complex           | -82.0                       | -61.5                         | -15.4                                                                  |

<sup>a</sup>Calculated at 298.15 K, 1 atm and with a scale factor of 0.952.

**Cartesian coordinates of optimized DFT structures** (complexes between chemosensor **1** and biogenic amines/neurotransmitters and isolated species).

Cad(2+):1 complex

$E = -2477.45579131$  hartree

$G$  (298.15 K, 1 atm, scale factor 0.952) = -2476.773346 hartree

charge=0; multiplicity=1

|   |             |             |             |
|---|-------------|-------------|-------------|
| O | -5.45852600 | -1.58587800 | -1.04130000 |
| C | -4.32685500 | -2.11430800 | -1.13377400 |
| O | -3.30704400 | -1.85931900 | -0.46524800 |
| C | -4.23525400 | -3.20314800 | -2.21576500 |
| H | -4.48224400 | -2.76045100 | -3.18142900 |
| H | -4.96525700 | -3.98419200 | -1.99903800 |
| N | -2.92304300 | -3.80092100 | -2.32133400 |
| N | -2.01442600 | -3.28851900 | -3.14771600 |
| N | -0.91045700 | -3.95464800 | -2.98531900 |
| C | -2.40546600 | -4.81264500 | -1.60257300 |
| H | -2.97876800 | -5.35687900 | -0.87015400 |
| C | -1.10262000 | -4.91187200 | -2.03967700 |
| C | -0.00543400 | -5.81497900 | -1.58545300 |
| H | -0.35540200 | -6.84200000 | -1.47811700 |
| H | 0.80856700  | -5.78758000 | -2.31800600 |
| O | 0.48989400  | -5.45442300 | -0.28785400 |

|   |             |             |             |
|---|-------------|-------------|-------------|
| C | 1.07310700  | -4.20909100 | -0.23947400 |
| C | 0.35385700  | -3.13880400 | 0.28343700  |
| C | 0.94957100  | -1.88596800 | 0.34515900  |
| H | 0.40072200  | -1.04446200 | 0.75333800  |
| H | -0.66256700 | -3.29961900 | 0.62644500  |
| C | 2.37605900  | -4.02634000 | -0.69363200 |
| H | 2.92153500  | -4.86981400 | -1.10356300 |
| C | 2.96450800  | -2.76910400 | -0.61268200 |
| H | 3.98354500  | -2.62673100 | -0.95815600 |
| C | 2.26094900  | -1.68202900 | -0.08731400 |
| C | 2.86934500  | -0.32355600 | -0.01509200 |
| C | 4.05833000  | -0.10157700 | 0.59159100  |
| C | 4.78796700  | 1.19406800  | 0.48207400  |
| C | 5.27464900  | 1.82707600  | 1.62979000  |
| C | 5.95655500  | 3.03674300  | 1.53952700  |
| C | 6.18358000  | 3.61958600  | 0.29474700  |
| C | 5.72596800  | 2.98330100  | -0.85740600 |
| C | 5.03296600  | 1.78101300  | -0.76344200 |
| H | 4.67324200  | 1.28867400  | -1.66156300 |
| H | 5.91090300  | 3.42231700  | -1.83180400 |
| H | 6.72009900  | 4.55910900  | 0.22219600  |
| H | 6.31363900  | 3.52207900  | 2.44125900  |
| H | 5.10659300  | 1.37063100  | 2.60085000  |
| C | 4.74166100  | -1.14499000 | 1.40796300  |
| C | 6.09335000  | -1.43144200 | 1.19065300  |
| C | 6.74222500  | -2.40908700 | 1.93792300  |
| C | 6.05369900  | -3.10002500 | 2.93290100  |
| C | 4.71419500  | -2.80383300 | 3.17576900  |
| C | 4.06412200  | -1.83473200 | 2.41846800  |
| H | 3.02028000  | -1.60624300 | 2.60896700  |
| H | 4.17437500  | -3.32577200 | 3.95842200  |
| H | 6.55982700  | -3.85805500 | 3.52030500  |
| H | 7.78658900  | -2.62912000 | 1.74530500  |

|   |             |             |             |
|---|-------------|-------------|-------------|
| H | 6.63473700  | -0.88915500 | 0.42103400  |
| C | 2.09391300  | 0.75626300  | -0.68419200 |
| C | 1.85551100  | 1.98462500  | -0.06843800 |
| C | 1.19390400  | 3.01969700  | -0.72723600 |
| H | 1.02331100  | 3.95448200  | -0.20845200 |
| H | 2.20538500  | 2.14783300  | 0.94603600  |
| C | 1.59020500  | 0.56353200  | -1.97823200 |
| H | 1.73175400  | -0.39412200 | -2.47042700 |
| C | 0.94683000  | 1.58550200  | -2.65500200 |
| H | 0.58759200  | 1.44644300  | -3.66846200 |
| C | 0.76820900  | 2.82988200  | -2.04237300 |
| O | 0.18364600  | 3.78481800  | -2.81577500 |
| C | 0.02124000  | 5.09075800  | -2.27794500 |
| H | 0.94387100  | 5.44016200  | -1.80280400 |
| H | -0.17510400 | 5.72009200  | -3.14736700 |
| C | -1.10863800 | 5.16383300  | -1.30194600 |
| N | -0.99610500 | 5.76568100  | -0.09033100 |
| N | -2.13328000 | 5.67391200  | 0.53590000  |
| C | -2.39122700 | 4.67899400  | -1.41526300 |
| H | -2.90512800 | 4.12943000  | -2.18648400 |
| N | -2.98071600 | 5.02646900  | -0.25651500 |
| C | -4.28372400 | 4.61616600  | 0.21899800  |
| H | -4.55467700 | 5.26486300  | 1.05379700  |
| H | -5.01669600 | 4.74447500  | -0.57764300 |
| C | -4.28577600 | 3.15160200  | 0.69707500  |
| O | -5.41505400 | 2.63679600  | 0.82952000  |
| O | -3.17074100 | 2.63292700  | 0.91955400  |
| N | -6.39348200 | 0.04275100  | 0.85618800  |
| H | -7.35013400 | 0.23291200  | 0.55755000  |
| H | -5.91984400 | 0.97051500  | 0.94842200  |
| H | -5.92713900 | -0.52444000 | 0.08618700  |
| C | -6.39226200 | -0.75658200 | 2.11485900  |
| H | -6.94548300 | -0.19693100 | 2.87251700  |

|   |             |             |            |
|---|-------------|-------------|------------|
| H | -6.92928300 | -1.68214100 | 1.90195300 |
| C | -4.96518000 | -1.03860200 | 2.56189800 |
| H | -4.99706800 | -1.78797900 | 3.35943600 |
| H | -4.42706500 | -1.49430700 | 1.72043100 |
| C | -4.26297100 | 0.22558000  | 3.05641300 |
| H | -4.36800800 | 1.02834700  | 2.31914800 |
| H | -4.77187700 | 0.58365900  | 3.95824500 |
| C | -2.77861000 | 0.05271700  | 3.37906200 |
| H | -2.36770700 | 1.02611000  | 3.66601700 |
| H | -2.64893600 | -0.61345200 | 4.23845700 |
| C | -1.93655700 | -0.52266300 | 2.24471000 |
| H | -0.87912400 | -0.40832800 | 2.48366500 |
| H | -2.13685700 | -1.58576100 | 2.09207500 |
| N | -2.20364800 | 0.15477400  | 0.93648800 |
| H | -2.65957300 | 1.10706000  | 1.02513100 |
| H | -1.34189000 | 0.29723300  | 0.40927000 |
| H | -2.80252700 | -0.47089300 | 0.34545900 |

Det(2+):1 complex

$E = -2493.48397007$  hartree

$G(298.15\text{ K}, 1\text{ atm, scale factor }0.952) = -2492.809916$  hartree

charge=0; multiplicity=1

|   |            |             |             |
|---|------------|-------------|-------------|
| O | 5.69193400 | 0.72642400  | 1.38987100  |
| C | 5.14098100 | -0.34173500 | 1.12824400  |
| O | 4.85057300 | -0.78941700 | -0.02424100 |
| C | 4.76004500 | -1.21422600 | 2.34109400  |
| H | 4.11099800 | -0.63903000 | 3.00170800  |
| H | 5.66631500 | -1.47854200 | 2.88704100  |
| N | 4.08040800 | -2.43865900 | 1.97328000  |
| N | 4.77807200 | -3.50404500 | 1.60703500  |
| N | 3.93578000 | -4.41569600 | 1.20619500  |
| C | 2.75965500 | -2.64144600 | 1.80079600  |
| H | 2.02407400 | -1.89188500 | 2.04214100  |



|   |             |             |             |
|---|-------------|-------------|-------------|
| C | 2.67527800  | -3.92516800 | 1.30560000  |
| C | 1.49435700  | -4.74796000 | 0.89303500  |
| H | 1.30693500  | -4.66428200 | -0.18461000 |
| H | 1.70570200  | -5.79559900 | 1.11300300  |
| O | 0.32363600  | -4.42223400 | 1.61840700  |
| C | -0.45871600 | -3.39497100 | 1.18234600  |
| C | -0.09915500 | -2.48377800 | 0.18987300  |
| C | -0.98993300 | -1.47189000 | -0.16646300 |
| H | -0.69848600 | -0.76240000 | -0.93543900 |
| H | 0.86407800  | -2.53729400 | -0.30341300 |
| C | -1.69769000 | -3.27650100 | 1.81668400  |
| H | -1.95339100 | -3.98253700 | 2.59860500  |
| C | -2.57629200 | -2.27737800 | 1.43728200  |
| H | -3.54243400 | -2.20110100 | 1.92590300  |
| C | -2.24646200 | -1.36571000 | 0.42627800  |
| C | -3.21592400 | -0.31253100 | 0.01529600  |
| C | -4.49136500 | -0.62317200 | -0.32215700 |
| C | -5.55982000 | 0.40570800  | -0.47289000 |
| C | -6.38397000 | 0.41229600  | -1.60258800 |
| C | -7.38594100 | 1.36721800  | -1.74646300 |
| C | -7.59505300 | 2.31681700  | -0.74867000 |
| C | -6.79696200 | 2.30241900  | 0.39351100  |
| C | -5.78758100 | 1.35512200  | 0.52854200  |
| H | -5.16343700 | 1.34801000  | 1.41673600  |
| H | -6.96199200 | 3.02840900  | 1.18222800  |
| H | -8.37957600 | 3.05757400  | -0.85664400 |
| H | -8.00603000 | 1.36699700  | -2.63628800 |
| H | -6.22919700 | -0.33198700 | -2.37826200 |
| C | -4.93565000 | -2.02815400 | -0.54881600 |
| C | -6.09842800 | -2.50775800 | 0.06317900  |
| C | -6.52003600 | -3.81837500 | -0.13760000 |
| C | -5.79686200 | -4.66498800 | -0.97502400 |
| C | -4.65164500 | -4.18987300 | -1.61070600 |

|   |             |             |             |
|---|-------------|-------------|-------------|
| C | -4.22526000 | -2.88300200 | -1.39807600 |
| H | -3.33186800 | -2.51557000 | -1.89288800 |
| H | -4.09038900 | -4.83669000 | -2.27634500 |
| H | -6.12774900 | -5.68479200 | -1.13730300 |
| H | -7.41564900 | -4.17741900 | 0.35762500  |
| H | -6.66916100 | -1.84854900 | 0.71062900  |
| C | -2.71929500 | 1.08876400  | 0.04270100  |
| C | -3.00772100 | 1.98669700  | -0.99493300 |
| C | -2.61637500 | 3.31117700  | -0.92497900 |
| H | -2.85122100 | 4.00735400  | -1.72238500 |
| H | -3.56167800 | 1.63999800  | -1.86112600 |
| C | -1.96596200 | 1.55876100  | 1.11815900  |
| H | -1.69804300 | 0.87713000  | 1.91985300  |
| C | -1.56930900 | 2.89253600  | 1.21079900  |
| H | -0.99383200 | 3.21659700  | 2.06841600  |
| C | -1.92292700 | 3.78067600  | 0.19542700  |
| O | -1.65378000 | 5.11435900  | 0.19927400  |
| C | -0.99430700 | 5.67057500  | 1.32903600  |
| H | -1.16005400 | 6.74514600  | 1.23791000  |
| H | -1.45528400 | 5.33047300  | 2.26220500  |
| C | 0.46754300  | 5.35997400  | 1.34636200  |
| N | 1.10001500  | 4.86861300  | 2.44164300  |
| N | 2.36406800  | 4.71741600  | 2.16916900  |
| C | 1.40532600  | 5.51199800  | 0.34992200  |
| H | 1.34767800  | 5.85668800  | -0.66915800 |
| N | 2.55697600  | 5.10650000  | 0.91370400  |
| C | 3.84767600  | 4.95786100  | 0.27824400  |
| H | 4.02548300  | 5.81562900  | -0.37151500 |
| H | 4.60664100  | 4.95332600  | 1.06213900  |
| C | 3.96411900  | 3.65600800  | -0.53656600 |
| O | 3.06528900  | 2.81156500  | -0.45432100 |
| O | 5.02481200  | 3.58117300  | -1.22123500 |
| N | 4.98244000  | 1.07841200  | -2.07986100 |

|   |            |             |             |
|---|------------|-------------|-------------|
| H | 5.07152300 | 2.10449600  | -1.76591800 |
| H | 4.95696300 | 0.46838700  | -1.23060200 |
| H | 5.80387200 | 0.79838900  | -2.61298600 |
| C | 3.74359900 | 0.89749300  | -2.88032200 |
| H | 3.94928300 | 1.22679600  | -3.90145100 |
| H | 2.98732000 | 1.54823100  | -2.44093500 |
| C | 3.27905700 | -0.54661700 | -2.84729800 |
| H | 2.35779600 | -0.63376100 | -3.44275600 |
| H | 3.03156200 | -0.80937300 | -1.81276000 |
| N | 4.33538700 | -1.43835700 | -3.31582000 |
| H | 4.57935000 | -1.19234500 | -4.27087800 |
| C | 3.96490000 | -2.84711300 | -3.28128600 |
| H | 4.65017800 | -3.39720700 | -3.93289500 |
| H | 2.94347300 | -3.03387200 | -3.64549200 |
| C | 4.06294300 | -3.41396700 | -1.87342100 |
| H | 3.32794800 | -2.97087700 | -1.19811700 |
| H | 3.92209500 | -4.49473100 | -1.88325000 |
| N | 5.40031300 | -3.10883400 | -1.28427200 |
| H | 5.63707400 | -3.78111300 | -0.55132100 |
| H | 6.13614600 | -3.11576600 | -1.99234700 |
| H | 5.35928800 | -2.16364300 | -0.82559400 |

Put(2+):1 complex

$E = -2438.16037466$  hartree

$G$  (298.15 K, 1 atm, scale factor 0.952) = -2437.500291 hartree

charge=0; multiplicity=1

|   |             |            |             |
|---|-------------|------------|-------------|
| O | -2.92582400 | 2.15021600 | 0.24407600  |
| C | -3.89687900 | 2.93190300 | 0.21713100  |
| O | -5.05498100 | 2.69780700 | -0.20019100 |
| C | -3.72687600 | 4.34289300 | 0.80105600  |
| H | -4.23030500 | 4.36681000 | 1.76982100  |
| H | -4.20839500 | 5.06863900 | 0.14618900  |
| N | -2.35225700 | 4.74100300 | 1.00428400  |

|   |             |             |             |
|---|-------------|-------------|-------------|
| N | -1.71315100 | 4.45126600  | 2.13350100  |
| N | -0.49380500 | 4.89154500  | 2.02181400  |
| C | -1.54380100 | 5.38085700  | 0.14044600  |
| H | -1.87401500 | 5.70225500  | -0.83362600 |
| C | -0.34281300 | 5.48007700  | 0.80712200  |
| C | 0.94685100  | 6.08001100  | 0.35449500  |
| H | 0.81644700  | 7.11970300  | 0.05157400  |
| H | 1.66928600  | 6.03848000  | 1.17660800  |
| O | 1.46251200  | 5.41819700  | -0.80484800 |
| C | 1.86456300  | 4.12120100  | -0.58398300 |
| C | 1.09920700  | 3.07602200  | -1.09059600 |
| C | 1.52789900  | 1.76459100  | -0.91676800 |
| H | 0.93174400  | 0.94796600  | -1.31357800 |
| H | 0.17936000  | 3.30122900  | -1.61879500 |
| C | 3.04187000  | 3.85955500  | 0.11213400  |
| H | 3.62409600  | 4.68294700  | 0.51211700  |
| C | 3.46717800  | 2.54732500  | 0.26965400  |
| H | 4.39301300  | 2.34146700  | 0.79684000  |
| C | 2.72789600  | 1.48344200  | -0.25778200 |
| C | 3.19912600  | 0.07861200  | -0.12024400 |
| C | 4.46132200  | -0.29598800 | -0.43586200 |
| C | 5.00137200  | -1.64607900 | -0.10602900 |
| C | 5.65667900  | -2.39999800 | -1.08466600 |
| C | 6.15975600  | -3.66352200 | -0.79059400 |
| C | 6.03629400  | -4.18270900 | 0.49626300  |
| C | 5.40933100  | -3.42831600 | 1.48589000  |
| C | 4.89551400  | -2.17103600 | 1.18596600  |
| H | 4.40435600  | -1.58630100 | 1.95738100  |
| H | 5.32208400  | -3.81795100 | 2.49431000  |
| H | 6.43311500  | -5.16477300 | 0.72843200  |
| H | 6.65118900  | -4.24102100 | -1.56594800 |
| H | 5.76114500  | -1.99485800 | -2.08684100 |
| C | 5.41317100  | 0.60845000  | -1.14167000 |

|   |             |             |             |
|---|-------------|-------------|-------------|
| C | 6.71199300  | 0.78230400  | -0.65322000 |
| C | 7.60791600  | 1.62697200  | -1.30083300 |
| C | 7.22501500  | 2.29285800  | -2.46329100 |
| C | 5.94204500  | 2.10552900  | -2.97340700 |
| C | 5.04385900  | 1.27069000  | -2.31672700 |
| H | 4.04368500  | 1.12825800  | -2.71374500 |
| H | 5.64025300  | 2.60806100  | -3.88593900 |
| H | 7.92425300  | 2.94677200  | -2.97247800 |
| H | 8.60639200  | 1.76236000  | -0.89970100 |
| H | 7.01572900  | 0.25813400  | 0.24816000  |
| C | 2.19169800  | -0.89330800 | 0.38275500  |
| C | 1.95353800  | -2.09310200 | -0.28554700 |
| C | 1.04954300  | -3.03522700 | 0.19570400  |
| H | 0.88331500  | -3.94295800 | -0.36715900 |
| H | 2.49173200  | -2.30419900 | -1.20408700 |
| C | 1.45671500  | -0.63152200 | 1.54542000  |
| H | 1.60455700  | 0.30501100  | 2.07490500  |
| C | 0.56807300  | -1.56750200 | 2.05404900  |
| H | 0.03424100  | -1.38388700 | 2.98046700  |
| C | 0.37088900  | -2.78292800 | 1.38785000  |
| O | -0.49253500 | -3.64926600 | 1.98568700  |
| C | -0.78721900 | -4.88276400 | 1.33105200  |
| H | 0.13421600  | -5.38866700 | 1.02792500  |
| H | -1.27401000 | -5.48392300 | 2.09912100  |
| C | -1.69212800 | -4.71521100 | 0.15341400  |
| N | -1.26788300 | -4.84155700 | -1.13211900 |
| N | -2.27176700 | -4.65055300 | -1.93277000 |
| C | -3.04113000 | -4.43570300 | 0.12173800  |
| H | -3.77719400 | -4.28867200 | 0.89565300  |
| N | -3.34738400 | -4.40951300 | -1.18778700 |
| C | -4.61846200 | -4.09240600 | -1.80194500 |
| H | -4.56384600 | -4.40540500 | -2.84558400 |
| H | -5.40778300 | -4.66215800 | -1.31008300 |

|   |             |             |             |
|---|-------------|-------------|-------------|
| C | -4.97570000 | -2.59686000 | -1.74628600 |
| O | -4.08162100 | -1.79039700 | -1.36027100 |
| O | -6.13069300 | -2.30751500 | -2.08077000 |
| N | -2.36099500 | -0.53989100 | 0.45232700  |
| H | -2.67296000 | 0.45307000  | 0.31015100  |
| H | -1.33958100 | -0.54624400 | 0.38228100  |
| H | -2.75165400 | -1.12380600 | -0.30843900 |
| C | -2.78533100 | -1.08191000 | 1.78125000  |
| H | -2.25116500 | -2.02310800 | 1.92451100  |
| H | -2.45399300 | -0.37022000 | 2.54099700  |
| C | -4.28875200 | -1.30744300 | 1.83476700  |
| H | -4.57169800 | -1.93195400 | 0.98120200  |
| H | -4.49222900 | -1.90252800 | 2.72826600  |
| C | -5.13617700 | -0.02001500 | 1.86438800  |
| H | -5.52061100 | 0.14186400  | 2.87353100  |
| H | -4.52489400 | 0.85840200  | 1.62980000  |
| C | -6.32179700 | -0.05159100 | 0.90801700  |
| H | -6.83993800 | -1.01273200 | 0.94284100  |
| H | -7.03505400 | 0.73873400  | 1.14524200  |
| N | -5.86617100 | 0.18613200  | -0.48941700 |
| H | -5.47595400 | 1.17435600  | -0.53345100 |
| H | -5.14749500 | -0.50336700 | -0.80485300 |
| H | -6.63710300 | 0.08385700  | -1.14996200 |

Spm(4+):1 complex

$E = -2785.53992547$  hartree

$G$  (298.15 K, 1 atm, scale factor 0.952) = -2784.659287 hartree

charge=+2; multiplicity=1

|   |             |             |            |
|---|-------------|-------------|------------|
| O | 0.22640200  | -0.00476000 | 0.02052500 |
| C | 0.13330300  | -0.06815000 | 1.27007200 |
| O | 1.10691900  | -0.07368700 | 2.05582700 |
| C | -1.23778200 | -0.13327400 | 1.94167400 |
| H | -1.28793600 | 0.65378200  | 2.69617800 |

|   |             |             |              |
|---|-------------|-------------|--------------|
| H | -1.33347400 | -1.09531000 | 2.44614700   |
| N | -2.34585100 | 0.01874700  | 1.02479600   |
| N | -2.52999900 | 1.17952900  | 0.39873700   |
| N | -3.60305100 | 1.07276300  | -0.32566800  |
| C | -3.30974500 | -0.86156800 | 0.70050200   |
| H | -3.35291800 | -1.85632700 | 1.11250700   |
| C | -4.12293600 | -0.17401900 | -0.17615900  |
| C | -5.36752400 | -0.63937800 | -0.86163700  |
| H | -5.84043900 | -1.41495400 | -0.25889200  |
| H | -6.07500500 | 0.18595500  | -0.97792000  |
| O | -5.11300600 | -1.26065600 | -2.11964600  |
| C | -5.02058400 | -0.48429900 | -3.23548100  |
| C | -4.95248700 | -1.17864800 | -4.44686700  |
| C | -4.87202900 | -0.48416100 | -5.64439900  |
| H | -4.83917800 | -1.03113400 | -6.58164600  |
| H | -4.97604300 | -2.26260300 | -4.42924500  |
| C | -4.97479900 | 0.90992800  | -3.23316100  |
| H | -4.99908100 | 1.47282800  | -2.30959700  |
| C | -4.86821100 | 1.58968600  | -4.44446000  |
| H | -4.81821400 | 2.67516300  | -4.43459800  |
| C | -4.83724000 | 0.91410500  | -5.66292300  |
| C | -4.72922700 | 1.67858300  | -6.93747200  |
| C | -5.66373500 | 1.61910500  | -7.90773900  |
| C | -5.48597000 | 2.29257200  | -9.22589100  |
| C | -4.32951400 | 2.10904900  | -9.98993700  |
| C | -4.18468600 | 2.74172800  | -11.22074200 |
| C | -5.19395700 | 3.57065900  | -11.70527500 |
| C | -6.35533600 | 3.75129700  | -10.95714600 |
| C | -6.50344400 | 3.10750500  | -9.73283600  |
| H | -7.41390400 | 3.24194900  | -9.15624200  |
| H | -7.14860800 | 4.39060800  | -11.32885700 |
| H | -5.07963100 | 4.06640900  | -12.66286700 |
| H | -3.28361800 | 2.58366600  | -11.80332500 |

|   |              |             |             |
|---|--------------|-------------|-------------|
| H | -3.54245700  | 1.46242900  | -9.61601300 |
| C | -6.94652700  | 0.87928200  | -7.73165400 |
| C | -7.76869500  | 1.09986700  | -6.62249700 |
| C | -8.96549400  | 0.40502500  | -6.47707900 |
| C | -9.35703200  | -0.52399800 | -7.43838600 |
| C | -8.55091100  | -0.74265200 | -8.55355400 |
| C | -7.36105400  | -0.03730200 | -8.70324800 |
| H | -6.73936200  | -0.20216800 | -9.57840500 |
| H | -8.85053100  | -1.45988800 | -9.30985800 |
| H | -10.28802500 | -1.06796800 | -7.32356800 |
| H | -9.59413800  | 0.59283700  | -5.61342000 |
| H | -7.46702200  | 1.82404800  | -5.87277200 |
| C | -3.50365000  | 2.51886800  | -7.03399400 |
| C | -2.24612200  | 1.92173300  | -6.97270200 |
| C | -1.07668200  | 2.67430800  | -7.01193300 |
| H | -0.12022700  | 2.16974100  | -6.96214900 |
| H | -2.17309300  | 0.83956700  | -6.90424000 |
| C | -3.57182000  | 3.91187800  | -7.12851700 |
| H | -4.54195600  | 4.39665500  | -7.17929900 |
| C | -2.41722600  | 4.67953800  | -7.14955500 |
| H | -2.46443300  | 5.76092900  | -7.21117600 |
| C | -1.16521000  | 4.06418700  | -7.08867700 |
| O | -0.09423500  | 4.90456100  | -7.10766200 |
| C | 1.19922300   | 4.34161900  | -7.15359100 |
| H | 1.27649600   | 3.61646200  | -7.97229400 |
| H | 1.86372900   | 5.17664000  | -7.38263000 |
| C | 1.60428300   | 3.70373300  | -5.85492400 |
| N | 0.91038400   | 3.85953100  | -4.70270900 |
| N | 1.51892000   | 3.20619700  | -3.75475200 |
| C | 2.69496100   | 2.90319600  | -5.58988700 |
| H | 3.50011700   | 2.53050900  | -6.20073200 |
| N | 2.59604500   | 2.63045600  | -4.27570000 |
| C | 3.49319400   | 1.87349500  | -3.42588200 |



|   |             |             |             |
|---|-------------|-------------|-------------|
| H | 4.25318500  | 1.41038900  | -4.05778800 |
| H | 3.99502400  | 2.54843400  | -2.73022200 |
| C | 2.77106200  | 0.76559500  | -2.64557500 |
| O | 3.37813700  | 0.37146300  | -1.61391900 |
| O | 1.68152900  | 0.35842300  | -3.07648000 |
| N | -0.43185200 | -1.22691700 | -2.34885500 |
| H | -0.41748300 | -2.24694900 | -2.35048200 |
| H | 0.45764800  | -0.87194500 | -2.75540200 |
| H | -0.40185500 | -0.91882800 | -1.35964600 |
| C | -1.63375900 | -0.71788900 | -3.08942600 |
| H | -2.47357500 | -0.71852800 | -2.38980200 |
| H | -1.84611700 | -1.44670600 | -3.87098200 |
| C | -1.43315800 | 0.64930800  | -3.73970700 |
| H | -0.48322900 | 0.67812800  | -4.28565400 |
| H | -2.22682000 | 0.73497700  | -4.48944000 |
| C | -1.58184300 | 1.88915500  | -2.86684200 |
| H | -2.52655300 | 1.88359800  | -2.31958200 |
| H | -1.53929900 | 2.77847500  | -3.50273200 |
| N | -0.49432000 | 2.05011300  | -1.85524100 |
| H | -0.49969300 | 1.28473700  | -1.16013100 |
| H | 0.40438700  | 2.00816300  | -2.35842700 |
| C | -0.58285600 | 3.33955900  | -1.10131900 |
| H | -0.38091400 | 4.13862500  | -1.81964300 |
| H | -1.61062800 | 3.41913500  | -0.74507500 |
| C | 0.39910500  | 3.35717900  | 0.06371000  |
| H | 0.15063100  | 4.21173300  | 0.69835600  |
| H | 0.23278700  | 2.46215500  | 0.67317300  |
| C | 1.85593000  | 3.46835700  | -0.39132800 |
| H | 2.04244000  | 2.82298800  | -1.25574100 |
| H | 2.04279300  | 4.48528300  | -0.74722100 |
| C | 2.89615500  | 3.14140500  | 0.67018100  |
| H | 3.87804900  | 3.50085600  | 0.35662400  |
| H | 2.65821400  | 3.57494900  | 1.64359500  |

|   |            |             |             |
|---|------------|-------------|-------------|
| N | 3.03473900 | 1.66159600  | 0.85398100  |
| H | 2.23943900 | 1.25634900  | 1.38084700  |
| H | 3.02610500 | 1.22663000  | -0.08851200 |
| C | 4.31490500 | 1.27793200  | 1.52577000  |
| H | 4.44084800 | 1.95252000  | 2.37424700  |
| H | 5.11406700 | 1.47023100  | 0.80558600  |
| C | 4.33875300 | -0.16345400 | 2.01838600  |
| H | 5.27932500 | -0.27459100 | 2.56435400  |
| H | 3.53676700 | -0.32737200 | 2.74433100  |
| C | 4.32183900 | -1.26905000 | 0.96755400  |
| H | 4.58551200 | -2.21133900 | 1.44506100  |
| H | 5.02875500 | -1.07703000 | 0.15851500  |
| N | 2.97225100 | -1.45706200 | 0.34057500  |
| H | 2.89080200 | -0.86510900 | -0.52099200 |
| H | 2.83066400 | -2.42963900 | 0.06703000  |
| H | 2.22134800 | -1.18446600 | 0.99729100  |

Spd(3+):1 complex

$E = -2611.85008179$  hartree

$G$  (298.15 K, 1 atm, scale factor 0.952) = -2611.081082 hartree

charge=+1; multiplicity=1

|   |            |            |             |
|---|------------|------------|-------------|
| O | 4.51645000 | 1.66976000 | -0.04460200 |
| C | 3.41362200 | 2.27539800 | -0.00425000 |
| O | 2.28044800 | 1.76463400 | 0.01357900  |
| C | 3.53504300 | 3.80479500 | 0.03536700  |
| H | 4.03386600 | 4.14127100 | -0.87551900 |
| H | 4.15241300 | 4.08745900 | 0.88874100  |
| N | 2.26512000 | 4.48163800 | 0.16247400  |
| N | 1.81989200 | 4.86453400 | 1.35616600  |
| N | 0.62871000 | 5.35921400 | 1.19740900  |
| C | 1.34243700 | 4.70955000 | -0.79054800 |
| H | 1.49973600 | 4.45134100 | -1.82507400 |
| C | 0.28886500 | 5.28038900 | -0.11519900 |

|   |             |             |             |
|---|-------------|-------------|-------------|
| C | -1.02090500 | 5.77978400  | -0.64125700 |
| H | -1.05338400 | 6.87001300  | -0.60452300 |
| H | -1.14802800 | 5.47060500  | -1.68491100 |
| O | -2.12976900 | 5.36860700  | 0.14315100  |
| C | -2.50049100 | 4.05960500  | 0.12107100  |
| C | -3.62174500 | 3.73706100  | 0.89202900  |
| C | -4.09595500 | 2.43620400  | 0.92289200  |
| H | -4.97478600 | 2.20011900  | 1.51479700  |
| H | -4.10934200 | 4.52376700  | 1.45680700  |
| C | -1.85003400 | 3.05967300  | -0.60149700 |
| H | -0.97777700 | 3.27323700  | -1.20313300 |
| C | -2.32449200 | 1.75204600  | -0.53665400 |
| H | -1.80235300 | 0.97732200  | -1.09091600 |
| C | -3.45796500 | 1.41896200  | 0.20270800  |
| C | -3.94613300 | 0.01327200  | 0.22483600  |
| C | -5.22471000 | -0.32606600 | -0.05051400 |
| C | -5.73402500 | -1.71623200 | 0.12576900  |
| C | -5.54756400 | -2.41265800 | 1.32404000  |
| C | -6.03321700 | -3.70749600 | 1.47599600  |
| C | -6.71236200 | -4.32797500 | 0.42969600  |
| C | -6.91520300 | -3.63858300 | -0.76388100 |
| C | -6.43954800 | -2.33914100 | -0.90881500 |
| H | -6.60672000 | -1.80114600 | -1.83733500 |
| H | -7.44744000 | -4.11137400 | -1.58206100 |
| H | -7.08801700 | -5.33844900 | 0.54655200  |
| H | -5.88402800 | -4.23062500 | 2.41434000  |
| H | -5.01917000 | -1.93151500 | 2.14077700  |
| C | -6.22234100 | 0.65756400  | -0.56031900 |
| C | -5.94165900 | 1.46998300  | -1.66328000 |
| C | -6.88509300 | 2.37703000  | -2.13508600 |
| C | -8.12447600 | 2.48795800  | -1.50830000 |
| C | -8.41910200 | 1.67447000  | -0.41626100 |
| C | -7.47875400 | 0.75885600  | 0.04536900  |

|   |             |             |             |
|---|-------------|-------------|-------------|
| H | -7.71420200 | 0.11969700  | 0.89131900  |
| H | -9.38319800 | 1.75010600  | 0.07467400  |
| H | -8.85850100 | 3.19781500  | -1.87317200 |
| H | -6.65264800 | 2.99596000  | -2.99490500 |
| H | -4.97565400 | 1.38700100  | -2.15114300 |
| C | -2.90616000 | -1.00094900 | 0.55371100  |
| C | -2.19425000 | -0.92224800 | 1.75594500  |
| C | -1.22389400 | -1.85833900 | 2.07216300  |
| H | -0.69918700 | -1.82054100 | 3.02049200  |
| H | -2.41914300 | -0.12692400 | 2.46041800  |
| C | -2.58587700 | -2.02488700 | -0.33375200 |
| H | -3.11911100 | -2.09700300 | -1.27673600 |
| C | -1.58581100 | -2.95304400 | -0.04942700 |
| H | -1.33873000 | -3.70303300 | -0.78710800 |
| C | -0.90574700 | -2.87454800 | 1.16455800  |
| O | 0.07880800  | -3.72904100 | 1.56986000  |
| C | 0.52069500  | -4.75488300 | 0.68527900  |
| H | 1.00627700  | -5.48917400 | 1.32831800  |
| H | -0.33279500 | -5.23821300 | 0.20263400  |
| C | 1.50768200  | -4.26587300 | -0.32675300 |
| N | 1.16196900  | -3.55638100 | -1.43695400 |
| N | 2.23024300  | -3.30130900 | -2.12947900 |
| C | 2.87396600  | -4.44919300 | -0.35888400 |
| H | 3.56087700  | -4.95529300 | 0.29971600  |
| N | 3.26644600  | -3.84700400 | -1.49765600 |
| C | 4.60573300  | -3.64485300 | -2.00600400 |
| H | 5.24381400  | -4.46212200 | -1.66775700 |
| H | 4.56793500  | -3.66244900 | -3.09571000 |
| C | 5.20468700  | -2.31468300 | -1.54547000 |
| O | 6.35218200  | -2.04484400 | -1.95262100 |
| O | 4.51663200  | -1.57803900 | -0.79505300 |
| N | 2.00825100  | -0.90876600 | 0.31980700  |
| H | 2.11807600  | 0.11086000  | 0.04912000  |

|   |            |             |             |
|---|------------|-------------|-------------|
| H | 2.81303000 | -1.41631300 | -0.08898100 |
| H | 1.14838700 | -1.28404700 | -0.09021700 |
| C | 1.97430900 | -0.97865800 | 1.81230400  |
| H | 1.70258900 | -1.99736200 | 2.09877700  |
| H | 1.18538800 | -0.29703100 | 2.13150000  |
| C | 3.32066900 | -0.56664500 | 2.38967800  |
| H | 3.17568200 | -0.27087900 | 3.43140700  |
| H | 3.64368700 | 0.33407300  | 1.85605700  |
| C | 4.36493200 | -1.68978600 | 2.31108600  |
| H | 4.20235800 | -2.30877300 | 1.42330100  |
| H | 4.25326300 | -2.35168700 | 3.17383100  |
| C | 5.80476900 | -1.19768500 | 2.29258900  |
| H | 6.49971700 | -2.03675600 | 2.22387400  |
| H | 6.05158300 | -0.60947200 | 3.17943400  |
| N | 6.05849400 | -0.32562800 | 1.10394400  |
| H | 5.54811700 | 0.56304100  | 1.19273700  |
| H | 5.60082400 | -0.77649200 | 0.27453700  |
| C | 7.50718100 | -0.03942600 | 0.87510600  |
| H | 7.95611100 | 0.06909200  | 1.86351800  |
| H | 7.94286700 | -0.91843300 | 0.39359500  |
| C | 7.74091500 | 1.24352600  | 0.07914500  |
| H | 8.75412000 | 1.58048500  | 0.31151800  |
| H | 7.06273700 | 2.02572800  | 0.43600400  |
| C | 7.67038500 | 1.14957200  | -1.43867400 |
| H | 7.86284300 | 2.13287600  | -1.86650700 |
| H | 8.41380500 | 0.45113100  | -1.82751100 |
| N | 6.33960800 | 0.68894600  | -1.93660600 |
| H | 6.20422800 | 0.97450900  | -2.90702300 |
| H | 6.29890600 | -0.36575000 | -1.92094200 |
| H | 5.55949200 | 1.08470400  | -1.37504500 |

Dop(1+):1 complex

$E = -2685.16257526$  hartree

*G* (298.15 K, 1 atm, scale factor 0.952) = -2684.506257 hartree

*charge*=-1; *multiplicity*=1

|   |             |             |             |
|---|-------------|-------------|-------------|
| O | 4.90967400  | -0.25293900 | 1.34899400  |
| C | 4.44581200  | -1.15380500 | 0.58661400  |
| O | 4.82039100  | -2.33103400 | 0.51514000  |
| C | 3.33462300  | -0.64970700 | -0.34209500 |
| H | 3.80133300  | -0.01377500 | -1.09827200 |
| H | 2.61431400  | -0.05393900 | 0.22331500  |
| N | 2.64536400  | -1.70144900 | -1.05783500 |
| N | 2.84139400  | -1.87191700 | -2.35957500 |
| N | 2.10638300  | -2.87492600 | -2.74468100 |
| C | 1.78013100  | -2.61603200 | -0.57395700 |
| H | 1.48131300  | -2.64319400 | 0.46066900  |
| C | 1.43653000  | -3.36753900 | -1.67355500 |
| C | 0.48300000  | -4.51420300 | -1.81794200 |
| H | -0.02215000 | -4.44727600 | -2.78881000 |
| H | 1.01409000  | -5.46719400 | -1.77895500 |
| O | -0.46136900 | -4.58189800 | -0.76416100 |
| C | -1.42954300 | -3.62397200 | -0.69785000 |
| C | -1.50659700 | -2.51740900 | -1.54451900 |
| C | -2.49956400 | -1.56623200 | -1.33110700 |
| H | -2.52795400 | -0.68543000 | -1.96600200 |
| H | -0.79097100 | -2.36470600 | -2.34162300 |
| C | -2.37806300 | -3.79129600 | 0.31347000  |
| H | -2.30661800 | -4.66035500 | 0.95790600  |
| C | -3.37979100 | -2.84866600 | 0.49068500  |
| H | -4.10982800 | -2.98272400 | 1.28321000  |
| C | -3.44774900 | -1.71181100 | -0.32025400 |
| C | -4.43844600 | -0.62981000 | -0.05673700 |
| C | -5.77243800 | -0.84253100 | -0.06420900 |
| C | -6.75163100 | 0.18450100  | 0.39270400  |
| C | -7.85585100 | 0.50317700  | -0.40421400 |
| C | -8.77707000 | 1.46153700  | 0.00660500  |

|   |             |             |             |
|---|-------------|-------------|-------------|
| C | -8.61973200 | 2.10061100  | 1.23448500  |
| C | -7.53699000 | 1.77224900  | 2.04762600  |
| C | -6.61038700 | 0.82278800  | 1.62885600  |
| H | -5.76582600 | 0.57049800  | 2.26226900  |
| H | -7.41432200 | 2.25429100  | 3.01149100  |
| H | -9.33987500 | 2.84359000  | 1.55894800  |
| H | -9.61966900 | 1.70659000  | -0.63080800 |
| H | -7.98575700 | 0.00026400  | -1.35804500 |
| C | -6.36528800 | -2.13335900 | -0.51645200 |
| C | -7.32178000 | -2.77864400 | 0.27446200  |
| C | -7.87975300 | -3.98796300 | -0.12756900 |
| C | -7.50550700 | -4.56116600 | -1.34098000 |
| C | -6.57190000 | -3.91487900 | -2.14816400 |
| C | -6.00610900 | -2.71188000 | -1.73801600 |
| H | -5.27974300 | -2.21024400 | -2.36909900 |
| H | -6.28519500 | -4.34597300 | -3.10124900 |
| H | -7.94404900 | -5.50059100 | -1.65886600 |
| H | -8.60930800 | -4.48111400 | 0.50559800  |
| H | -7.62207500 | -2.33011100 | 1.21691200  |
| C | -3.81488400 | 0.68572300  | 0.25449000  |
| C | -4.20421900 | 1.87221700  | -0.37853700 |
| C | -3.56987100 | 3.07199300  | -0.09715100 |
| H | -3.85968100 | 3.98812200  | -0.59967200 |
| H | -5.00797400 | 1.85011500  | -1.10787200 |
| C | -2.76966600 | 0.74925400  | 1.17542000  |
| H | -2.43714500 | -0.16039900 | 1.66644400  |
| C | -2.13706900 | 1.94810600  | 1.48874300  |
| H | -1.33271200 | 1.94690100  | 2.21145800  |
| C | -2.53380700 | 3.11748500  | 0.84071900  |
| O | -1.97604100 | 4.34173000  | 1.05168600  |
| C | -0.89306300 | 4.44017100  | 1.96964500  |
| H | -0.74988900 | 5.51321100  | 2.10235500  |
| H | -1.16178500 | 4.00587300  | 2.93872600  |

|   |            |             |             |
|---|------------|-------------|-------------|
| C | 0.36093000 | 3.79348900  | 1.47125400  |
| N | 1.00942400 | 2.83262800  | 2.17910200  |
| N | 2.05980500 | 2.45031200  | 1.51612300  |
| C | 1.06370000 | 4.00250000  | 0.30574900  |
| H | 0.91278600 | 4.65435900  | -0.53858200 |
| N | 2.10227100 | 3.15137800  | 0.38610400  |
| C | 3.14389600 | 2.92056900  | -0.58942200 |
| H | 3.57925200 | 3.87672300  | -0.88573700 |
| H | 3.92423900 | 2.32949900  | -0.09853900 |
| C | 2.65237100 | 2.16440300  | -1.84114200 |
| O | 3.54517400 | 2.04402500  | -2.74380700 |
| O | 1.50358100 | 1.73746800  | -1.87980400 |
| C | 8.07300800 | 1.45166700  | 0.26501000  |
| H | 8.73699900 | 1.76030400  | 1.06719100  |
| C | 7.34579600 | 2.41303800  | -0.42699500 |
| H | 7.43280200 | 3.46526100  | -0.17705300 |
| C | 6.50201500 | 2.05994100  | -1.47869200 |
| O | 5.86690100 | 3.04005900  | -2.17120100 |
| H | 4.96124000 | 2.72553100  | -2.45983700 |
| C | 6.38300700 | 0.70192700  | -1.82127300 |
| O | 5.62171900 | 0.27915200  | -2.87057800 |
| H | 4.82771600 | 0.84013100  | -2.97049600 |
| C | 7.10516700 | -0.25399800 | -1.11125700 |
| H | 6.98352300 | -1.29480300 | -1.39785700 |
| C | 7.95796200 | 0.10144600  | -0.06946000 |
| C | 8.73791400 | -0.94780700 | 0.68775200  |
| H | 8.62796500 | -1.92223900 | 0.19944700  |
| H | 9.80563900 | -0.70592700 | 0.67197600  |
| C | 8.33850800 | -1.07307500 | 2.15391100  |
| H | 8.41144600 | -0.11223400 | 2.66657400  |
| H | 8.98491300 | -1.78863200 | 2.66465200  |
| N | 6.93447600 | -1.53852800 | 2.29440900  |
| H | 6.14769400 | -0.85642600 | 1.91389700  |



|   |            |             |            |
|---|------------|-------------|------------|
| H | 6.71801600 | -1.73517800 | 3.27155200 |
| H | 6.75945600 | -2.39901000 | 1.76734600 |

Spm(3+):1 complex

$E = -2785.08616218$  hartree

$G(298.15\text{ K}, 1\text{ atm. scale factor } 0.952) = -2784.222149$  hartree

charge=+1; multiplicity=1

|   |             |             |             |
|---|-------------|-------------|-------------|
| O | -0.00121200 | -0.02017400 | -0.23499300 |
| C | 0.02549400  | -0.07032000 | 1.00844200  |
| O | 1.03978800  | -0.24321400 | 1.72872000  |
| C | -1.32765400 | 0.13383600  | 1.70532700  |
| H | -2.08547600 | -0.48384800 | 1.22304500  |
| H | -1.61291500 | 1.18206500  | 1.58439200  |
| N | -1.33726200 | -0.21090100 | 3.11302400  |
| N | -2.18197600 | -1.14018000 | 3.56381000  |
| N | -2.00986600 | -1.24815600 | 4.84489800  |
| C | -0.60314900 | 0.29707400  | 4.11890600  |
| H | 0.13771100  | 1.06342800  | 3.96577100  |
| C | -1.04262500 | -0.37637300 | 5.23896800  |
| C | -0.60428800 | -0.22490600 | 6.65890900  |
| H | -0.37198300 | 0.81930100  | 6.86866100  |
| H | -1.40173400 | -0.53863700 | 7.33780500  |
| O | 0.61111600  | -0.91853300 | 6.93724000  |
| C | 0.59377900  | -2.28161600 | 6.95400300  |
| C | 1.83671600  | -2.90157400 | 6.80294300  |
| C | 1.93082200  | -4.28418800 | 6.80398800  |
| H | 2.90093200  | -4.75605200 | 6.66971400  |
| H | 2.71548000  | -2.27769800 | 6.67536200  |
| C | -0.54859100 | -3.06092700 | 7.12624300  |
| H | -1.52819700 | -2.61187900 | 7.21695000  |
| C | -0.43250500 | -4.45046600 | 7.15932500  |
| H | -1.32403900 | -5.05246100 | 7.30765700  |
| C | 0.79878700  | -5.08208600 | 7.00090900  |

|   |             |              |             |
|---|-------------|--------------|-------------|
| C | 0.92414200  | -6.56911800  | 7.01540600  |
| C | 0.73395600  | -7.30621300  | 8.12653100  |
| C | 0.76929300  | -8.79745800  | 8.10428300  |
| C | 1.59411600  | -9.48474400  | 9.00031800  |
| C | 1.64982400  | -10.87479900 | 8.99157700  |
| C | 0.86189200  | -11.59977400 | 8.09997700  |
| C | 0.01865900  | -10.92523900 | 7.22034700  |
| C | -0.02550400 | -9.53415400  | 7.22165700  |
| H | -0.68496400 | -9.01160300  | 6.53670100  |
| H | -0.60890100 | -11.48192800 | 6.53292500  |
| H | 0.89927400  | -12.68347000 | 8.09629300  |
| H | 2.30540700  | -11.39178900 | 9.68373800  |
| H | 2.20132100  | -8.92163100  | 9.70305900  |
| C | 0.46869700  | -6.69083600  | 9.45903600  |
| C | -0.62682700 | -7.12324500  | 10.21345400 |
| C | -0.90301500 | -6.55858500  | 11.45448900 |
| C | -0.07194300 | -5.56680500  | 11.97099400 |
| C | 1.03591000  | -5.14677500  | 11.23881600 |
| C | 1.30309600  | -5.70396700  | 9.99176900  |
| H | 2.16900800  | -5.37646200  | 9.42627600  |
| H | 1.69686700  | -4.38597600  | 11.63960900 |
| H | -0.28193500 | -5.12992900  | 12.94096600 |
| H | -1.76477700 | -6.89597600  | 12.01986900 |
| H | -1.27055200 | -7.90312100  | 9.81721400  |
| C | 1.27642800  | -7.17217900  | 5.69752100  |
| C | 2.51322800  | -7.78362600  | 5.47238800  |
| C | 2.83149900  | -8.30087000  | 4.22539000  |
| H | 3.79015600  | -8.77385600  | 4.04419900  |
| H | 3.23188800  | -7.85288000  | 6.28329800  |
| C | 0.37658900  | -7.09696200  | 4.63841900  |
| H | -0.58829900 | -6.62639500  | 4.80285900  |
| C | 0.67539200  | -7.61634700  | 3.38081900  |
| H | -0.05491300 | -7.52821800  | 2.58528800  |

|   |             |             |             |
|---|-------------|-------------|-------------|
| C | 1.91293000  | -8.22488100 | 3.17525800  |
| O | 2.31163800  | -8.80265500 | 2.00612200  |
| C | 1.56362600  | -8.55302700 | 0.82892800  |
| H | 1.88107300  | -9.33076600 | 0.13180600  |
| H | 0.48836500  | -8.67119200 | 0.98733300  |
| C | 1.85892800  | -7.20280500 | 0.25141300  |
| N | 0.92329000  | -6.45986400 | -0.38909600 |
| N | 1.49381100  | -5.40209900 | -0.89530400 |
| C | 3.06670500  | -6.54804400 | 0.13906000  |
| H | 4.06123500  | -6.77650700 | 0.48419200  |
| N | 2.78267900  | -5.44546900 | -0.58175400 |
| C | 3.69659300  | -4.40234300 | -1.01112900 |
| H | 4.71388900  | -4.77250400 | -0.89562200 |
| H | 3.51756600  | -4.20211700 | -2.07022200 |
| C | 3.52869700  | -3.08909400 | -0.23720400 |
| O | 4.53132000  | -2.34323800 | -0.18906000 |
| O | 2.40704800  | -2.83788100 | 0.26045800  |
| N | -0.12205400 | -2.78553200 | -0.82141500 |
| H | -0.09363600 | -3.03470700 | 0.19526700  |
| H | 0.56509100  | -3.40767100 | -1.25828700 |
| H | 0.15674600  | -1.80010200 | -0.92468500 |
| C | -1.50924800 | -3.04517900 | -1.29667500 |
| H | -1.51103600 | -2.99769400 | -2.38580900 |
| H | -2.13221400 | -2.23345200 | -0.91288600 |
| C | -2.00223100 | -4.39661900 | -0.79068300 |
| H | -2.97319700 | -4.59418500 | -1.25212000 |
| H | -1.31902300 | -5.18704800 | -1.12492300 |
| C | -2.15167100 | -4.45364000 | 0.72975000  |
| H | -2.61763600 | -5.40674700 | 1.02135000  |
| H | -2.81777300 | -3.64889600 | 1.06408500  |
| N | -0.85250100 | -4.25478900 | 1.38087200  |
| H | -0.24878800 | -5.02744500 | 1.09976500  |
| C | -0.91547100 | -4.20080000 | 2.84266900  |

|   |             |             |             |
|---|-------------|-------------|-------------|
| H | -1.79743400 | -3.61818800 | 3.12162300  |
| H | -1.03772500 | -5.20423900 | 3.27114600  |
| C | 0.32008000  | -3.50911200 | 3.41226400  |
| H | 0.28723700  | -2.47240200 | 3.04496900  |
| H | 0.24289500  | -3.47119400 | 4.50528100  |
| C | 1.63142600  | -4.18503700 | 3.00200700  |
| H | 1.71786800  | -5.15694200 | 3.49834900  |
| H | 1.64407600  | -4.36527700 | 1.92133500  |
| C | 2.88090000  | -3.39683000 | 3.36757900  |
| H | 2.99092900  | -3.29544000 | 4.44814300  |
| H | 3.77692000  | -3.87858000 | 2.96711300  |
| N | 2.85172900  | -2.01500500 | 2.80236700  |
| H | 2.64632000  | -2.11422000 | 1.77529600  |
| H | 2.05627200  | -1.48949500 | 3.18006300  |
| C | 4.11262900  | -1.25719800 | 3.05677900  |
| H | 4.88906500  | -1.70943900 | 2.43400300  |
| H | 4.36375200  | -1.43182900 | 4.10441300  |
| C | 3.97085100  | 0.24516500  | 2.80890100  |
| H | 2.97912100  | 0.58079100  | 3.12907500  |
| H | 4.69359300  | 0.74845600  | 3.45533900  |
| C | 4.25669600  | 0.73351900  | 1.39376600  |
| H | 5.29120600  | 0.52712700  | 1.11213600  |
| H | 4.09340200  | 1.80979500  | 1.34413200  |
| N | 3.38221100  | 0.08565500  | 0.37598000  |
| H | 3.78224100  | -0.85338200 | 0.11693700  |
| H | 2.40296100  | -0.03942800 | 0.74996900  |
| H | 3.33611600  | 0.64517900  | -0.47530400 |

Spm(4+):1 complex

$E = -2785.53372629$  hartree

$G(298.15\text{ K}, 1\text{ atm. scale factor } 0.952) = -2784.653954$  hartree

charge=+2; multiplicity=1

|   |             |            |            |
|---|-------------|------------|------------|
| O | -3.17852300 | 1.91163600 | 0.40106800 |
|---|-------------|------------|------------|

|   |             |             |             |
|---|-------------|-------------|-------------|
| C | -3.99372500 | 2.59211800  | -0.25807800 |
| O | -4.84973400 | 2.15765800  | -1.06666000 |
| C | -3.97476100 | 4.11255800  | -0.05887200 |
| H | -4.54230500 | 4.35579400  | 0.84197400  |
| H | -4.42532400 | 4.61092200  | -0.91484000 |
| N | -2.62204000 | 4.60081900  | 0.08899400  |
| N | -1.92880800 | 4.92211900  | -1.00107200 |
| N | -0.71530400 | 5.19188600  | -0.63011600 |
| C | -1.84787200 | 4.65143300  | 1.18986500  |
| H | -2.22217300 | 4.42291500  | 2.17436600  |
| C | -0.61341400 | 5.03660500  | 0.71570200  |
| C | 0.67905500  | 5.27369300  | 1.42853300  |
| H | 1.44262100  | 5.54026300  | 0.68970300  |
| H | 0.58201200  | 6.09307500  | 2.14217400  |
| O | 1.11495800  | 4.16703100  | 2.21150000  |
| C | 1.74598400  | 3.13871100  | 1.57683300  |
| C | 1.59896600  | 2.83648700  | 0.22195700  |
| C | 2.28762100  | 1.74883000  | -0.31389100 |
| H | 2.16115400  | 1.51577200  | -1.36783800 |
| H | 0.96403800  | 3.43148000  | -0.42111700 |
| C | 2.58219400  | 2.35429400  | 2.37380000  |
| H | 2.69186300  | 2.60660400  | 3.42264900  |
| C | 3.28048500  | 1.29204900  | 1.81701300  |
| H | 3.94937300  | 0.70762100  | 2.44153200  |
| C | 3.14418300  | 0.97116400  | 0.46226200  |
| C | 3.83675000  | -0.22385900 | -0.10960300 |
| C | 5.10916600  | -0.19047100 | -0.54796700 |
| C | 5.84063400  | -1.41526100 | -0.98448400 |
| C | 6.51243200  | -1.42392000 | -2.21063700 |
| C | 7.20089400  | -2.55611200 | -2.63496700 |
| C | 7.24702700  | -3.68941200 | -1.82596100 |
| C | 6.60209800  | -3.68163400 | -0.59127500 |
| C | 5.90262500  | -2.55325500 | -0.17488400 |

|   |             |             |             |
|---|-------------|-------------|-------------|
| H | 5.40166000  | -2.54925800 | 0.78779600  |
| H | 6.64553800  | -4.55423400 | 0.05133300  |
| H | 7.78918700  | -4.57007500 | -2.15199200 |
| H | 7.70541700  | -2.55139500 | -3.59492100 |
| H | 6.48738700  | -0.53728500 | -2.83745100 |
| C | 5.90203000  | 1.07254600  | -0.58832000 |
| C | 7.11731800  | 1.14255700  | 0.10109100  |
| C | 7.87531100  | 2.30841700  | 0.08747100  |
| C | 7.43913100  | 3.41670200  | -0.63631600 |
| C | 6.24299800  | 3.34895000  | -1.34531000 |
| C | 5.47928900  | 2.18477100  | -1.32009400 |
| H | 4.55335900  | 2.13246900  | -1.88210400 |
| H | 5.90312500  | 4.20146500  | -1.92321200 |
| H | 8.03238500  | 4.32417100  | -0.65340900 |
| H | 8.80855800  | 2.35067400  | 0.63823900  |
| H | 7.46362400  | 0.27598400  | 0.65680300  |
| C | 3.00838200  | -1.46337900 | -0.10219600 |
| C | 2.72194500  | -2.17687500 | -1.27077400 |
| C | 1.91993200  | -3.30923900 | -1.23584800 |
| H | 1.67736100  | -3.84978700 | -2.14402700 |
| H | 3.12621600  | -1.83455100 | -2.21839300 |
| C | 2.47525800  | -1.93016100 | 1.09821800  |
| H | 2.67697600  | -1.39437300 | 2.02078200  |
| C | 1.69288100  | -3.07754900 | 1.15550700  |
| H | 1.29388000  | -3.38905700 | 2.10970100  |
| C | 1.39575300  | -3.76221000 | -0.02176900 |
| O | 0.59609700  | -4.86345500 | -0.08967000 |
| C | -0.14054900 | -5.23539500 | 1.07090300  |
| H | -0.50518000 | -6.23993600 | 0.85760500  |
| H | 0.51439600  | -5.29313000 | 1.94408200  |
| C | -1.31407300 | -4.34372300 | 1.33766700  |
| N | -1.24291600 | -3.14720300 | 1.97636400  |
| N | -2.43935000 | -2.64541300 | 2.07141900  |

|   |             |             |             |
|---|-------------|-------------|-------------|
| C | -2.64033400 | -4.57205300 | 1.03151900  |
| H | -3.14817200 | -5.39081400 | 0.54883300  |
| N | -3.29031700 | -3.49902000 | 1.50697600  |
| C | -4.71204600 | -3.22952000 | 1.51371400  |
| H | -5.21793800 | -4.06704100 | 1.03390000  |
| H | -5.06098900 | -3.16936100 | 2.54645500  |
| C | -5.10040300 | -1.93671700 | 0.78772900  |
| O | -4.21156500 | -1.21992500 | 0.27442300  |
| O | -6.33142300 | -1.71449000 | 0.79647900  |
| N | -7.03697300 | 0.56948300  | -0.30741100 |
| H | -6.72397600 | -0.32054300 | 0.20965800  |
| H | -6.21423800 | 1.17248400  | -0.47625700 |
| H | -7.67337200 | 1.09365300  | 0.29314100  |
| C | -7.71864800 | 0.19411400  | -1.57890200 |
| H | -7.86604100 | 1.09991000  | -2.17041100 |
| H | -8.69719800 | -0.19700300 | -1.30086200 |
| C | -6.96689100 | -0.87555900 | -2.36512400 |
| H | -6.69219600 | -1.70517700 | -1.70410800 |
| H | -7.68516100 | -1.28405500 | -3.08083300 |
| C | -5.76904900 | -0.43327100 | -3.19708600 |
| H | -5.97511900 | 0.49326700  | -3.73900000 |
| H | -5.53647900 | -1.21065300 | -3.92628800 |
| N | -4.52009400 | -0.20546300 | -2.41217200 |
| H | -4.60287800 | 0.67205600  | -1.83903700 |
| H | -4.38094400 | -0.95216100 | -1.71674500 |
| C | -3.31970800 | -0.06178800 | -3.29058300 |
| H | -3.24556600 | -0.96590600 | -3.89954500 |
| H | -3.51830000 | 0.78801700  | -3.94581000 |
| C | -2.06532600 | 0.16403800  | -2.46328600 |
| H | -1.28797400 | 0.55738600  | -3.12342900 |
| H | -2.27843600 | 0.95723400  | -1.73609600 |
| C | -1.55107400 | -1.11042900 | -1.78260200 |
| H | -2.37334300 | -1.71294100 | -1.37600400 |

|   |             |             |             |
|---|-------------|-------------|-------------|
| H | -1.04014000 | -1.73691500 | -2.51873600 |
| C | -0.57769000 | -0.81791200 | -0.65465100 |
| H | -0.11117200 | -1.72632800 | -0.27058800 |
| H | 0.20629700  | -0.11610600 | -0.95105200 |
| N | -1.30705300 | -0.20001300 | 0.49557300  |
| H | -1.77119700 | 0.67646500  | 0.20565400  |
| H | -2.08099900 | -0.84024900 | 0.73060500  |
| C | -0.42605600 | 0.06343200  | 1.68158400  |
| H | 0.53401500  | 0.39432300  | 1.27699900  |
| H | -0.27978700 | -0.89309000 | 2.19012600  |
| C | -0.98423600 | 1.15146000  | 2.58901300  |
| H | -0.17106500 | 1.45654200  | 3.25408700  |
| H | -1.24213400 | 2.03135500  | 1.98910500  |
| C | -2.14751800 | 0.76511100  | 3.49066500  |
| H | -2.46810300 | 1.63122200  | 4.06831900  |
| H | -1.87297700 | -0.03527200 | 4.17922600  |
| N | -3.34460000 | 0.28044000  | 2.72642000  |
| H | -3.51635600 | 0.84868800  | 1.87346700  |
| H | -3.22562400 | -0.70692000 | 2.45195200  |
| H | -4.18373900 | 0.32560300  | 3.30868900  |

TPE (dicarboxylate)

$E = -2168.14322459$  hartree

$G$  (298.15 K, 1 atm, scale factor 0.952) = -2167.665915 hartree

charge=-2; multiplicity=1

|   |            |             |             |
|---|------------|-------------|-------------|
| C | 2.71800600 | -0.31663800 | -0.22068300 |
| C | 4.00467900 | -0.68594700 | -0.02008400 |
| C | 4.38839400 | -2.05981600 | 0.41205200  |
| C | 5.40726200 | -2.74862700 | -0.25394500 |
| C | 3.77077400 | -2.67173900 | 1.50759200  |
| C | 5.77542600 | -4.03090800 | 0.14119800  |
| H | 5.90682500 | -2.27638500 | -1.09472200 |
| C | 4.14574400 | -3.94849900 | 1.91268900  |



|   |             |             |             |
|---|-------------|-------------|-------------|
| H | 2.99052100  | -2.13885900 | 2.04190100  |
| C | 5.14459700  | -4.63591400 | 1.22604000  |
| H | 6.55751100  | -4.55619100 | -0.39611600 |
| H | 3.65927600  | -4.40575600 | 2.76748400  |
| H | 5.43471900  | -5.63270600 | 1.53923200  |
| C | 5.14222700  | 0.25818300  | -0.21114900 |
| C | 6.12704800  | 0.38371700  | 0.77418000  |
| C | 5.26634400  | 1.01194800  | -1.38258200 |
| C | 7.18816400  | 1.26856000  | 0.61044100  |
| H | 6.05122400  | -0.20986400 | 1.68049900  |
| C | 6.33297600  | 1.88812000  | -1.55423600 |
| H | 4.51775100  | 0.90772600  | -2.16160400 |
| C | 7.29394500  | 2.02520100  | -0.55468700 |
| H | 7.93428700  | 1.36485300  | 1.39168500  |
| H | 6.41513100  | 2.46193800  | -2.47093600 |
| H | 8.12348300  | 2.71106700  | -0.68616500 |
| C | 2.31900300  | 1.10330300  | -0.42907800 |
| C | 2.71889600  | 2.10464300  | 0.46058800  |
| C | 1.48433200  | 1.45102800  | -1.49556800 |
| C | 2.29328600  | 3.41815400  | 0.29704800  |
| H | 3.36333300  | 1.84803700  | 1.29535600  |
| C | 1.06284900  | 2.76252400  | -1.67396700 |
| H | 1.15247300  | 0.68163500  | -2.18610100 |
| C | 1.45900900  | 3.74204800  | -0.76878400 |
| H | 2.59220700  | 4.18823600  | 1.00037500  |
| H | 0.40157500  | 3.03495700  | -2.48931500 |
| C | 1.59259800  | -1.29086300 | -0.23770400 |
| C | 0.42495900  | -1.04130100 | 0.48295500  |
| C | 1.65554500  | -2.46820000 | -0.99458600 |
| C | -0.63697400 | -1.94406700 | 0.49738400  |
| H | 0.34151000  | -0.12521300 | 1.06114100  |
| C | 0.60496800  | -3.36844400 | -1.00489800 |
| H | 2.54363400  | -2.67691600 | -1.58256100 |

|   |             |             |             |
|---|-------------|-------------|-------------|
| C | -0.54365000 | -3.12087100 | -0.24564900 |
| H | -1.51745600 | -1.71735200 | 1.08436600  |
| H | 0.65273500  | -4.27779800 | -1.59345200 |
| O | -1.49403100 | -4.08967700 | -0.29383800 |
| O | 0.98301700  | 5.02338000  | -0.92441100 |
| C | -2.69893100 | -3.91333800 | 0.44037600  |
| H | -3.14526500 | -4.90929600 | 0.46087400  |
| H | -2.48623300 | -3.61799900 | 1.47304100  |
| C | -0.01777100 | 5.37903600  | 0.04887100  |
| H | -0.33385500 | 6.38732600  | -0.21973100 |
| H | 0.43201000  | 5.39679900  | 1.04674000  |
| C | -3.64474000 | -2.94561900 | -0.19663800 |
| C | -4.33195900 | -1.88610600 | 0.35451300  |
| H | -4.33906500 | -1.40619400 | 1.32271500  |
| C | -1.17359100 | 4.43938700  | 0.01372100  |
| C | -1.37043900 | 3.26684700  | 0.71031900  |
| H | -0.81431700 | 2.77671500  | 1.49316100  |
| C | -6.12961400 | -0.41331700 | -0.59762500 |
| H | -5.88346300 | 0.25799700  | 0.22894200  |
| H | -6.12019800 | 0.14452600  | -1.53496300 |
| C | -3.19922200 | 1.55046700  | 0.59156400  |
| H | -3.87896600 | 1.29300300  | -0.22243500 |
| H | -2.47432100 | 0.73999400  | 0.69695300  |
| N | -2.49851800 | 2.75342000  | 0.19366200  |
| N | -2.99133600 | 3.54870100  | -0.75372700 |
| N | -2.19298400 | 4.56802100  | -0.87475000 |
| N | -5.09459600 | -1.42619900 | -0.65547600 |
| N | -4.02778100 | -3.06286900 | -1.49498300 |
| N | -4.90467700 | -2.13845200 | -1.76003300 |
| C | -7.54753000 | -0.99205800 | -0.34945600 |
| C | -4.00159500 | 1.69107300  | 1.91224700  |
| O | -3.96665400 | 2.78333700  | 2.50255800  |
| O | -7.64148600 | -2.20269900 | -0.07512600 |

|   |             |             |             |
|---|-------------|-------------|-------------|
| O | -4.60872100 | 0.64502900  | 2.23432400  |
| O | -8.45780600 | -0.13990400 | -0.43814800 |

Cad(2+)

$E = -309.24211844$  hartree

$G$  (298.15 K, 1 atm, scale factor 0.952) = -309.060097 hartree

charge=+2; multiplicity=1

|   |             |             |             |
|---|-------------|-------------|-------------|
| C | -2.50304900 | 0.51630300  | -0.04397500 |
| H | -2.55876900 | 1.08110000  | -0.97487400 |
| H | -2.55520200 | 1.20749300  | 0.79762200  |
| C | -1.26304700 | -0.35685400 | 0.01308200  |
| H | -1.28266700 | -0.96922100 | 0.92161500  |
| H | -1.25451500 | -1.03869600 | -0.84490100 |
| C | -0.00000300 | 0.50241300  | 0.00082800  |
| H | -0.00551300 | 1.15215900  | -0.88169600 |
| H | 0.00553600  | 1.15500700  | 0.88124900  |
| C | 1.26300900  | -0.35688600 | -0.00895000 |
| H | 1.25534300  | -1.03525000 | 0.85177500  |
| H | 1.28161500  | -0.97297400 | -0.91497600 |
| N | -3.74326600 | -0.32596100 | 0.01847300  |
| H | -3.80069800 | -0.83925500 | 0.90139500  |
| H | -4.58927200 | 0.24316000  | -0.06261400 |
| H | -3.76200000 | -1.01384000 | -0.73865800 |
| C | 2.50320100  | 0.51636700  | 0.04301700  |
| H | 2.55283000  | 1.20612000  | -0.79992000 |
| H | 2.56178500  | 1.08276700  | 0.97276400  |
| N | 3.74318700  | -0.32609300 | -0.02173400 |
| H | 3.79879000  | -0.83948000 | -0.90471800 |
| H | 4.58944500  | 0.24289500  | 0.05760900  |
| H | 3.76336000  | -1.01388300 | 0.73545900  |

Det(2+)

$E = -325.26680434$  hartree

*G (298.15 K, 1 atm, scale factor 0.952) = -325.093812 hartree*

*charge=+2; multiplicity=1*

|   |             |             |             |
|---|-------------|-------------|-------------|
| C | -1.20898000 | -0.38393800 | 0.09135600  |
| H | -1.16038900 | -1.08212800 | -0.75105400 |
| H | -1.32055200 | -0.97872700 | 1.01135900  |
| C | -2.40555600 | 0.53722800  | -0.08359000 |
| H | -2.48672100 | 1.25513400  | 0.73323000  |
| H | -2.35435400 | 1.07135100  | -1.03126100 |
| N | -0.00000100 | 0.42639900  | 0.08178900  |
| H | -0.00000800 | 1.02881700  | 0.90212600  |
| N | -3.67560800 | -0.25525200 | -0.08704100 |
| H | -3.80380900 | -0.76838800 | 0.78932700  |
| H | -4.49021400 | 0.35152900  | -0.20776000 |
| H | -3.68927800 | -0.93846400 | -0.84896800 |
| C | 1.20898000  | -0.38393500 | 0.09137300  |
| H | 1.16038700  | -1.08214900 | -0.75101600 |
| H | 1.32055600  | -0.97869800 | 1.01139300  |
| C | 2.40555200  | 0.53722900  | -0.08360400 |
| H | 2.35434300  | 1.07132700  | -1.03128900 |
| H | 2.48672000  | 1.25515700  | 0.73319600  |
| N | 3.67560700  | -0.25524700 | -0.08704300 |
| H | 3.68927900  | -0.93846900 | -0.84896100 |
| H | 4.49021100  | 0.35153600  | -0.20777000 |
| H | 3.80381000  | -0.76836900 | 0.78933200  |

Put(2+)

*E = -269.94342236 hartree*

*G (298.15 K, 1 atm, scale factor 0.952) = -269.785164 hartree*

*charge=+2; multiplicity=1*

|   |             |             |             |
|---|-------------|-------------|-------------|
| C | 0.00056000  | 0.00006200  | 0.00658700  |
| H | -0.01599900 | -0.00095700 | 1.09678500  |
| H | 1.03596400  | -0.00104700 | -0.33501600 |
| C | -0.78569100 | 1.16444400  | -0.56938300 |

|   |             |             |             |
|---|-------------|-------------|-------------|
| H | -0.77411400 | 1.11255400  | -1.66332000 |
| H | -1.82945700 | 1.10137300  | -0.24387500 |
| C | -0.18150100 | 2.49075700  | -0.10867300 |
| H | -0.19327000 | 2.54273400  | 0.98526200  |
| H | 0.86237300  | 2.55363000  | -0.43392300 |
| C | -0.96740800 | 3.65523600  | -0.68489300 |
| H | -0.95076000 | 3.65614700  | -1.77508700 |
| H | -2.00284700 | 3.65679300  | -0.34339800 |
| N | -0.59647300 | -1.30320300 | -0.43124000 |
| H | -0.59124500 | -1.39569300 | -1.45042300 |
| H | -0.07617000 | -2.09609600 | -0.04795900 |
| N | -0.36993600 | 4.95840600  | -0.24750100 |
| H | 0.60034700  | 5.04897500  | -0.55958400 |
| H | -0.89065800 | 5.75136200  | -0.63000100 |
| H | -0.37413500 | 5.05074700  | 0.77167900  |
| H | -1.56712300 | -1.39358000 | -0.12018100 |

Spm(3+)

$E = -616.82409867$  hartree

$G$  (298.15 K, 1 atm, scale factor 0.952) = -616.470399 hartree

charge=+3; multiplicity=1

|   |             |             |             |
|---|-------------|-------------|-------------|
| C | 1.97203100  | 1.61015200  | 0.16488200  |
| H | 1.96219400  | 1.60465700  | 1.26879800  |
| H | 1.71778200  | 2.62522500  | -0.15628200 |
| C | 0.90307600  | 0.65036500  | -0.34962200 |
| H | 0.91771800  | 0.65876300  | -1.44518300 |
| H | 1.12568800  | -0.37351200 | -0.02898600 |
| C | -0.48352800 | 1.04281000  | 0.15849700  |
| H | -0.48890300 | 1.04178700  | 1.25486300  |
| H | -0.72380500 | 2.06043900  | -0.17117700 |
| C | -1.53665400 | 0.07722900  | -0.35484600 |
| H | -1.58836000 | 0.07299600  | -1.44502800 |
| H | -1.35826300 | -0.94048700 | -0.00330500 |

|   |             |             |             |
|---|-------------|-------------|-------------|
| N | 3.29665800  | 1.29626200  | -0.36563700 |
| H | 3.89409500  | 2.10638000  | -0.22740700 |
| N | -2.90265100 | 0.46381600  | 0.13345900  |
| H | -2.88547200 | 0.52653900  | 1.15631700  |
| H | -3.11925400 | 1.40715500  | -0.20402000 |
| C | 3.92133100  | 0.15133600  | 0.28505600  |
| H | 3.93803200  | 0.25970300  | 1.38351200  |
| H | 3.33644600  | -0.74680500 | 0.05963000  |
| C | 5.34314000  | -0.03737800 | -0.23225900 |
| H | 5.93046700  | 0.86485900  | -0.02413600 |
| H | 5.31655400  | -0.17540900 | -1.31803400 |
| C | 5.99750500  | -1.23567400 | 0.42988400  |
| H | 6.07025700  | -1.11643500 | 1.51108200  |
| H | 5.46824400  | -2.16304100 | 0.20838800  |
| N | 7.39876200  | -1.41539700 | -0.07346700 |
| H | 7.97426400  | -0.59262300 | 0.12365700  |
| H | 7.85294900  | -2.21982100 | 0.36528000  |
| H | 7.41481400  | -1.56690300 | -1.08536600 |
| C | -3.97831100 | -0.48230900 | -0.29043400 |
| H | -3.70359700 | -1.46284800 | 0.10173300  |
| H | -3.95452100 | -0.51616200 | -1.38074800 |
| C | -5.33556700 | -0.02988000 | 0.23077300  |
| H | -5.31543500 | 0.01680200  | 1.32426300  |
| H | -5.56694200 | 0.96958800  | -0.15082100 |
| C | -6.39908600 | -1.01747200 | -0.22604200 |
| H | -6.21378400 | -2.01842200 | 0.16263900  |
| H | -6.47001200 | -1.06282100 | -1.31267700 |
| N | -7.74887000 | -0.60788500 | 0.27428900  |
| H | -8.46560400 | -1.27266200 | -0.02888700 |
| H | -7.77946000 | -0.57184300 | 1.29689900  |
| H | -8.02044900 | 0.31470800  | -0.07760200 |

$E = -617.26603604$  hartree

$G$  (298.15 K, 1 atm, scale factor 0.952) = -616.895389 hartree

charge=+4; multiplicity=1

|   |             |             |             |
|---|-------------|-------------|-------------|
| C | -1.85837700 | 0.48304400  | 0.14358000  |
| H | -1.86207200 | 1.06941400  | -0.77649200 |
| H | -1.92126500 | 1.15953200  | 0.99754600  |
| C | -0.63894900 | -0.42046200 | 0.22345100  |
| H | -0.68191900 | -1.02930800 | 1.13260500  |
| H | -0.63123800 | -1.10201600 | -0.63437300 |
| C | 0.63894700  | 0.42048700  | 0.22347200  |
| H | 0.63119800  | 1.10214300  | -0.63427000 |
| H | 0.68196100  | 1.02922100  | 1.13269800  |
| C | 1.85836700  | -0.48301600 | 0.14343600  |
| H | 1.92128400  | -1.15961300 | 0.99731300  |
| H | 1.86202500  | -1.06926700 | -0.77671200 |
| N | -3.12282700 | -0.32282400 | 0.13992200  |
| H | -3.18186900 | -0.86106400 | 1.01013700  |
| N | 3.12282400  | 0.32284200  | 0.13983800  |
| H | 3.07986100  | 1.01142200  | -0.61787600 |
| H | 3.18188000  | 0.86100100  | 1.01010200  |
| C | -4.35540300 | 0.50908900  | -0.01706300 |
| H | -4.35928300 | 1.22372000  | 0.80761300  |
| H | -4.24807700 | 1.05091100  | -0.95806900 |
| C | -5.60207500 | -0.36510900 | -0.01239400 |
| H | -5.68351100 | -0.89402700 | 0.94232600  |
| H | -5.53864400 | -1.11126200 | -0.81122000 |
| C | -6.82601700 | 0.51331900  | -0.22410900 |
| H | -6.93963900 | 1.24888500  | 0.57200400  |
| H | -6.79485200 | 1.02648400  | -1.18520700 |
| N | -8.07053200 | -0.31786500 | -0.22049500 |
| H | -8.18849600 | -0.81723000 | 0.66530500  |
| H | -8.90178500 | 0.26394700  | -0.35572600 |
| H | -8.06167200 | -1.01475500 | -0.97025800 |

|   |             |             |             |
|---|-------------|-------------|-------------|
| C | 4.35539000  | -0.50907300 | -0.01722600 |
| H | 4.24806900  | -1.05080100 | -0.95828800 |
| H | 4.35924600  | -1.22378600 | 0.80737900  |
| C | 5.60207700  | 0.36510300  | -0.01244500 |
| H | 5.53870700  | 1.11129800  | -0.81123600 |
| H | 5.68346500  | 0.89397200  | 0.94230600  |
| C | 6.82601600  | -0.51333700 | -0.22412100 |
| H | 6.79491400  | -1.02644900 | -1.18525000 |
| H | 6.93956300  | -1.24894900 | 0.57195900  |
| N | 8.07054900  | 0.31782000  | -0.22036400 |
| H | 8.90180300  | -0.26400700 | -0.35552800 |
| H | 8.06177900  | 1.01472900  | -0.97011200 |
| H | 8.18843800  | 0.81716100  | 0.66546000  |
| H | -3.07986500 | -1.01133700 | -0.61785200 |

Spd(3+)

$E = -443.60511201 \text{ hartree}$

$G (298.15 \text{ K, } 1 \text{ atm, scale factor } 0.952) = -443.340342 \text{ hartree}$

charge=+3; multiplicity=1

|   |             |             |             |
|---|-------------|-------------|-------------|
| C | 0.64190200  | 0.44263800  | 0.11733700  |
| H | 0.59728200  | 1.11091100  | -0.74410800 |
| H | 0.63026400  | 1.03902500  | 1.03090100  |
| C | 1.85318200  | -0.47246700 | 0.04899000  |
| H | 1.84957100  | -1.16284500 | 0.89895400  |
| H | 1.80815500  | -1.07133000 | -0.86712800 |
| C | 3.14030200  | 0.35292500  | 0.06002600  |
| H | 3.11710800  | 1.08600700  | -0.75369000 |
| H | 3.21862800  | 0.90436300  | 1.00290000  |
| C | 4.34578000  | -0.55571100 | -0.10683100 |
| H | 4.42510900  | -1.28046700 | 0.70380000  |
| H | 4.32409200  | -1.08528600 | -1.05955200 |
| N | -0.63045000 | -0.35131900 | 0.10630500  |
| H | -0.66928100 | -0.93918800 | 0.94504400  |



|   |             |             |             |
|---|-------------|-------------|-------------|
| N | 5.61272100  | 0.24506600  | -0.09123600 |
| H | 6.43407200  | -0.35301200 | -0.21100200 |
| H | 5.62567900  | 0.93714100  | -0.84503300 |
| H | 5.72601900  | 0.74952200  | 0.79191400  |
| H | -0.61785500 | -0.99693900 | -0.68974300 |
| C | -1.85790700 | 0.49908100  | 0.03018500  |
| H | -1.81231100 | 1.19546900  | 0.86868600  |
| H | -1.78835400 | 1.06015500  | -0.90305800 |
| C | -3.11465200 | -0.35893300 | 0.07818800  |
| H | -3.17891100 | -0.87154300 | 1.04332400  |
| H | -3.07993100 | -1.11752800 | -0.71096600 |
| C | -4.33228500 | 0.53171900  | -0.11908500 |
| H | -4.42370900 | 1.27713400  | 0.67085600  |
| H | -4.31244900 | 1.03406900  | -1.08634800 |
| N | -5.58543500 | -0.28558800 | -0.08675900 |
| H | -5.69383500 | -0.77799300 | 0.80403700  |
| H | -6.41271600 | 0.30379500  | -0.21298800 |
| H | -5.59553400 | -0.98738700 | -0.83194100 |

Dop(1+)

$E = -516.96428098$  hartree

$G$  (298.15 K, 1 atm, scale factor 0.952) = -516.810915 hartree

charge=+1; multiplicity=1

|   |             |             |             |
|---|-------------|-------------|-------------|
| C | 0.00847900  | 0.07561600  | -0.00806400 |
| C | -0.01384400 | -0.04812900 | 1.38382400  |
| C | 1.18847600  | -0.16719900 | 2.07414400  |
| C | 2.40294500  | -0.16572600 | 1.38802800  |
| C | 2.41615400  | -0.04443800 | 0.00832600  |
| C | 1.21157200  | 0.07721400  | -0.69498800 |
| H | -0.91273500 | 0.16470600  | -0.57598600 |
| H | 1.18608700  | -0.26783200 | 3.15446000  |
| H | 3.33968200  | -0.26361600 | 1.92708400  |
| C | -1.32851000 | -0.00889100 | 2.12523800  |

|   |             |             |             |
|---|-------------|-------------|-------------|
| H | -2.11026800 | -0.49723200 | 1.53468300  |
| H | -1.23795300 | -0.54830200 | 3.07314600  |
| C | -1.72889500 | 1.43491100  | 2.40055800  |
| H | -0.99075000 | 1.94492000  | 3.01977200  |
| H | -1.87419800 | 1.99705000  | 1.47774500  |
| N | -3.02955200 | 1.48814600  | 3.14797200  |
| H | -3.30759600 | 2.45271500  | 3.34348700  |
| H | -3.78588400 | 1.05148100  | 2.61437600  |
| H | -2.96355400 | 0.99912200  | 4.04445200  |
| O | 1.21608900  | 0.19147200  | -2.04867800 |
| H | 2.13083900  | 0.16182700  | -2.36001700 |
| O | 3.54242400  | -0.03646100 | -0.76181300 |
| H | 4.32985100  | -0.14434200 | -0.21657100 |
